# Supplementary material for: Genetic variation at hair length candidate genes in elephants and the extinct woolly mammoth
Source: Springer Nature journal article supplement (doi:10.1186/1471-2148-9-232), 2009-01-01
Supplement: 12862_2009_1146_MOESM1_ESM.pdf [file 12862_2009_1146_MOESM1_ESM.pdf]

## ADDITIONAL FILE 1

### Supplementary information for laboratory and analytical procedures.

### Genetic variation at hair length candidate genes in elephants and the extinct woolly mammoth

Alfred L. Roca<sup>1\*</sup>, Yasuko Ishida<sup>1</sup>, Nikolas Nikolaidis<sup>2</sup>, Sergios-Orestis Kolokotronis<sup>3</sup>, Stephen Fratpietro<sup>4</sup>, Kristin Stewardson<sup>4</sup>, Shannon Hensley<sup>5</sup>, Michele Tisdale<sup>5</sup>, Gennady Boeskorov<sup>6</sup> and Alex D. Greenwood<sup>5\*</sup>

<sup>1</sup> Department of Animal Sciences, University of Illinois at Urbana-Champaign, Urbana, IL 61801, USA

<sup>2</sup> Department of Biological Science, College of Natural Sciences and Mathematics, California State University at Fullerton, Fullerton, CA 92834, USA

<sup>3</sup> Sackler Institute for Comparative Genomics, American Museum of Natural History, New York, NY 10024, USA

<sup>4</sup> Paleo-DNA Laboratory, Lakehead University, Thunder Bay, ON P7B 5E1, Canada

<sup>5</sup> Department of Biological Sciences, Old Dominion University, Norfolk, VA 23529, USA

<sup>6</sup> Institute for Diamond and Precious Metals Geology, Siberian Branch of Russian Academy of Sciences, Yakutsk, Russian Federation

\*Corresponding authors

E-mail addresses: A.L. Roca, [roca@illinois.edu](mailto:roca@illinois.edu); Y. Ishida, [yishida@illinois.edu](mailto:yishida@illinois.edu); N. Nikolaidis, [nnikolaidis@fullerton.edu](mailto:nnikolaidis@fullerton.edu); S.O. Kolokotronis, [koloko@amnh.org](mailto:koloko@amnh.org); S. Fratpietro, [swfratpi@lakeheadu.ca](mailto:swfratpi@lakeheadu.ca); K. Stewardson, [kmstewar@lakeheadu.ca](mailto:kmstewar@lakeheadu.ca); S. Hensley, [shens003@odu.edu](mailto:shens003@odu.edu); M. Tisdale, [mtisdoo3@odu.edu](mailto:mtisdoo3@odu.edu); G. Boeskorov, [gboeskorov@yandex.ru](mailto:gboeskorov@yandex.ru); A.D. Greenwood, [agreenwo@odu.edu](mailto:agreenwo@odu.edu)

## ADDITIONAL FILE 1, TABLE OF CONTENTS

|                                                                        |             |
|------------------------------------------------------------------------|-------------|
| Additional Text: Ancient DNA methods, mammoth mtDNA and exon 2         | Pages 3-7   |
| Additional Table S1: Elephant <i>FGF5</i> primer sequences             | Page 8      |
| Additional Table S2: Elephant <i>FGF5</i> primer combinations tested   | Page 9      |
| Additional Figures S1-S4: Primers for woolly mammoth <i>FGF5</i>       | Pages 10-14 |
| Additional Figure S5: Graphical depiction of FGF5 amino acid variation | Pages 15-17 |
| Additional Figure S6: FGF5 protein maximum likelihood phylogram        | Pages 18-19 |
| Additional Figures S7-S10: Clone sequences for mammoth <i>FGF5</i>     | Pages 20-54 |

## **Additional Text**

### **Details of protocols for ancient DNA**

Extractions of mammoth samples in Norfolk were carried out in a room dedicated to ancient DNA work in a CleanSpot PCR hood (Coy Laboratory) following an established protocol [1]. Approximately 0.5 gram of drilled bone powder was used per extraction. The room had never been previously used for molecular biological work. Separating rooms used for processing ancient DNA samples and performing modern molecular biological investigations is a useful way of minimizing contamination risk [2]. Amplified PCR products never entered the clean room nor did modern DNA. Extraction of DNA from the bone samples was done using GeneClean Ancient DNA Kits (MP Biomedicals) according to manufacturer's instructions. Mock extractions were performed to control for contamination introduced during extraction.

PCR amplifications were performed at least twice per primer pair. PCR amplification was performed for 40 cycles using HiFi Supermix (Invitrogen) which is known to perform well on ancient DNA extracts [3]. Annealing temperatures were chosen based on the  $T_m$  of the primers. All PCR products were cloned into T overhang vectors, transformed into competent bacteria, with positives colonies identified by colony PCR using M13 forward and reverse primers and multiple clones per PCR product sequenced using T7 or SP6 primers (Functional Biosciences, Inc.). Direct sequencing can lead to an erroneous sequence due to contamination and DNA damage in the extract. Cloning and sub-sampling individual representative amplified sequences provides a better representation of the original template amplified [4], therefore none of the consensus sequences generated in this study were determined from direct sequencing.

All pre-amplification work in Thunder Bay was performed in a 'Clean Lab'. Only ancient and degraded samples with low-copy number are allowed in the Clean Lab area. This lab is physically separated from post-amplification analysis, free from PCR product, slight positive pressure, surface sterilized weekly with a thorough monthly sterilization, and monitored quarterly to ensure the absence of modern DNA contamination. The outer surface of the container holding the tooth and bone were surface sterilized with 10% bleach, irradiated with UV light for 20 minutes, then passed

into a clean laboratory area. Preventative measures were taken to reduce the introduction of modern DNA to this area by wearing protective gear: a Tyvek™ suit (Kepler), hair net, face mask, an extra pair of Tyvek™ sleeves (Kepler), inner pair of nitrile gloves, outer pair of latex gloves, and safety glasses. In addition, once suited up, each analyst entered an air shower designed to remove any residual surface particulates from the external surface of the Tyvek™ suit before entering the Clean Lab.

The bone and tooth sample were surface sterilized with successive washes of 10% bleach, sterilized water, and 70% ethanol (Fisher). A Dremel™ tool was used with separate bits to cut a small portion of sample. These samples were separately milled into a fine powder using a Retsch mixer mill. Approximately 200 mg of powder was placed into 2.0 mL tubes. The extraction buffer was prepared using a modified protocol [5]: 1.5 mL of 0.5M EDTA (Sigma), 75 µL of 20% N-lauroylsarcosine (Sigma), and 40 µL of Proteinase K (Qiagen). A blank tube was also prepared containing extraction buffer only to act as a negative control. The tubes were placed onto an Eppendorf Thermomixer-R to incubate overnight at 56°C and 1000 rpm.

Next, the sample tubes were centrifuged for 5 minutes at 13,000 rpm and the aqueous extract transferred to a sterile 15 mL tube; 400 µL of phenol (Sigma) and 400 µL of chloroform:isoamyl alcohol (24:1, v/v) (Sigma) were added directly to each 15 mL tube. The tubes were vortexed for 1 minute then centrifuged for 5 minutes at maximum speed. The extract in each tube separated into two layers. The top layer was transferred with a pipette into a sterile 15 mL tube and the above process repeated with this layer. The bottom layer was discarded. After transferring the top layer to another sterile 15 mL tube for the second time, 800 µL of chloroform:isoamyl alcohol (24:1, v/v) was added. The tubes were vortexed for 1 minute then centrifuged for 5 minutes at maximum speed. The top layer was transferred to another sterile 15 mL tube. To each tube was added a 10% volume of 3M sodium acetate (Sigma) and 2.5 times the volume of cold anhydrous ethanol (Commercial Alcohols). These tubes were placed into a -20°C freezer overnight to allow precipitation of product. The next day, the tubes were centrifuged for 5 minutes at maximum speed. The supernatant was discarded. A volume of 1.5 mL of 95% ethanol (Commercial Alcohols) was added to each tube, the tubes vortexed to resuspend the precipitate and centrifuged for 10 minutes at maximum speed. The supernatant was

discarded and the precipitate allowed to dry for 1 hour. After this time the precipitate was resuspended in 100  $\mu\text{L}$  TE buffer (10 mM Tris-HCl, pH 8.0, 10 mM EDTA) and purified additionally with Micro Bio-Spin 30 Chromatography Columns (Biorad).

The samples were amplified using Platinum<sup>®</sup> *Taq* DNA Polymerase (Invitrogen), 25  $\mu\text{L}$  reaction: 2.5  $\mu\text{L}$  10X PCR buffer (minus Mg), 0.5  $\mu\text{L}$  dNTP (0.25mM each, Invitrogen), 1.0  $\mu\text{L}$  50 mM  $\text{MgCl}_2$ , 0.1 $\mu\text{L}$  Platinum<sup>®</sup> *Taq* DNA Polymerase (5U/ $\mu\text{L}$ ), 0.5  $\mu\text{L}$  primer mix (0.1  $\mu\text{M}$  each), 0.5  $\mu\text{L}$  20 mg/mL BSA (Fermentas) on an Eppendorf Mastercycler<sup>™</sup>. A hot start of 94°C for 2 minutes was used followed by 50 cycles of 94°C for 30 seconds denaturation, 47-65°C for 1 minute annealing, and 72°C for 2 minutes extension. 5  $\mu\text{L}$  of each PCR product was mixed with 3  $\mu\text{L}$  of 6X dye and resolved using 6% polyacrylamide gel electrophoresis run at 118V for 45 minutes. Ultra low range (Fermentas) size ladder was run in tandem with the PCR products. The 6% PAGE gel was stained with 0.4  $\mu\text{g}/\text{mL}$  ethidium bromide (Sigma) for visualization of successful DNA amplification. Successful PCR products were purified using the QIAquick PCR purification kit (Qiagen) as per manufacturer's protocol. Colony PCR and sequencing were performed as in Norfolk.

### **Indigirka mammoth mtDNA clade**

Recent genetic analysis of woolly mammoth populations suggests that there are two distinct mtDNA clades of mammoths with "Clade II" having become extinct much earlier than "Clade I" or the species as a whole. Whether Clade I and Clade II mammoths differ in phenotype is not clear. A 100 bp fragment of the mitochondrial DNA 16S rDNA was sequenced, which indicated that the Indigirka mammoth sample belonged to Clade I, the more common mtDNA clade of woolly mammoth [6].

### **Jarkov mammoth, exon 2 results**

While the complete *FGF5* coding sequence was obtained for an Indigirka mammoth, few *FGF5* fragments could be retrieved from the Jarkov mammoth. All *FGF5* fragments retrieved were identical in sequence between the Indigirka mammoth and the Jarkov mammoth, with the exception of exon 2 amplicons from the Jarkov mammoth, which may have been due to contamination. Exon 2 was amplified in two

fragments. The first fragment was identical between all elephants and mammoth samples sequenced and differed from human at two positions. A second exon 2 fragment in the Jarkov mammoth was identical to human but differed from the elephants and the Indigirka mammoth at two positions. It seems likely that the second amplified fragment from the Jarkov mammoth represents contamination rather than variation among mammoth sequences. The difficulty in distinguishing between the alternatives is that exon 2 only differs between elephantids and human at four positions. The controls were negative and the same sequence was obtained from the Jarkov mammoth in all clones of two independent PCR reactions. This does not exclude the possibility that human contamination of the sample itself yielded the result. However, the other amplifications were identical to the Indigirka mammoth suggesting that contamination with human DNA was not present (Additional Figure S2). In addition, primers used to amplify mammoth sequences were designed based on elephant sequences which are quite divergent at the DNA level from human and thus not expected to co-amplify. The Jarkov mammoth failed to yield products for the majority of the PCR reactions successful with the Indigirka mammoth. Thus, it remains unclear whether there is among mammoth diversity in the *FGF5* gene. Given the complete sequencing from the Indigirka mammoth, and the limited success for the majority of the PCRs from the Jarkov mammoth, further analysis was restricted to the Indigirka sequence.

## Additional References

1. Calvignac S, Terme JM, Hensley SM, Jalinot P, Greenwood AD, Hanni C: **Ancient DNA identification of early 20th century simian T-cell leukemia virus type 1.** *Mol Biol Evol* 2008, **25**(6):1093-1098.
2. Willerslev E, Cooper A: **Ancient DNA.** *Proc Biol Sci* 2005, **272**(1558):3-16.
3. Rohland N, Hofreiter M: **Comparison and optimization of ancient DNA extraction.** *Biotechniques* 2007, **42**(3):343-352.
4. Cooper A, Poinar HN: **Ancient DNA: do it right or not at all.** *Science* 2000, **289**(5482):1139.
5. Loreille OM, Diegoli TM, Irwin JA, Coble MD, Parsons TJ: **High efficiency DNA extraction from bone by total demineralization.** *Forensic Sci Int Genet* 2007, **1**(2):191-195.
6. Gilbert MT, Tomsho LP, Rendulic S, Packard M, Drautz DI, Sher A, Tikhonov A, Dalen L, Kuznetsova T, Kosintsev P *et al*: **Whole-genome shotgun sequencing of mitochondria from ancient hair shafts.** *Science* 2007, **317**(5846):1927-1930.

Table S1. *FGF5* oligonucleotide primer sequences used with extant elephant samples

| Primer name               | Primer sequence                 |
|---------------------------|---------------------------------|
| <b>exon 1</b>             |                                 |
| FGF5X1-L1F (67)           | ACCCCAGCGGCTGGAAGA              |
| FGF5X1-L2F (62)           | TCTCCCGAGGCTATGTCCA             |
| FGF5X1-10F (60)           | ATGAGCTTGTCTTCCTCCTC            |
| FGF5X1-60F (66)           | CTCAGCGCCTGGGCTCAC              |
| FGF5X1-80F (69)           | TCGCCCCAAAGGGCAAC               |
| FGF5X1-170F (62)          | GCAGCACACGCTTCCTC               |
| FGF5X1-240F (61)          | GAGCAGAGCAGCTTCCAGTG            |
| FGF5X1-290F (61)          | CCGGCAGCCTCTACTGC               |
| FGF5X1-300F (62)          | GTGGGCATCGTTTCCAT               |
| FGF5X1-350R (54)          | CTTAACATACTGGCTTCGTG            |
| FGF5X1-320R (61)          | ACTTTGCCATCCGGGTAGAT            |
| FGF5X1-290R (60)          | AAACCGATGCCCACTCTG              |
| FGF5X1-250R (65x)         | CGAGGGGCTCCACTGGAA              |
| FGF5X1-170R (63)          | GGAGGGAGAGGAGGAAGACG            |
| FGF5X1-100R (61)          | GGTCCAGGTTGCCCTTTG              |
| FGF5X1-50R (66)           | CCCAGGCGCTGAGGATCA              |
| FGF5X1-R1R (62)           | GGTTTTGTAGAAGCGAGCAAC           |
| FGF5X1-R2R (61)           | CTCTCACCTAGCAACGGTTTTG          |
| <b>exon 2</b>             |                                 |
| FGF5X2-L3F (58)           | GTTTTATTTGGGATTTCTGTCATC        |
| FGF5X2-L4F (62)           | CAATAACATGAGTCTGTGTTTTATTGG     |
| FGF5X2-360F (58)          | GTATTTTGAAATATTTGCCTGTGTC       |
| FGF5X2-370F (60)          | GGAAATATTTGCTGTGCTCAGG          |
| FGF5X2-460R (59)          | CACCTGCGTGGAGTTTTCC             |
| FGF5X2-450R (59)          | TGGAGTTTTCTTTTTTTGACAT          |
| FGF5X2-R3R (59)           | CATCGTTAACAATATAAAGTGGTTCTAC    |
| FGF5X2-R4R (58x)          | TTCTGTTTTAAAAACAGAAAATCTCC      |
| <b>exon3</b>              |                                 |
| FGF5X3-L5F (59x)          | CTATTTTCATCTCTCTTTTTTTCTCC      |
| FGF5X2-L6F (59x)          | AGGTAGAAAATATTACCACTATTTTCATCTC |
| FGF5X3-480F (59)          | TTACAGATGACTGCAAGTTCAGG         |
| FGF5X3-520F (57)          | AGAGATTTCAAGAAAACAGCTATAATAC    |
| FGF5X3-540F (59)          | CTCAGCAATACACAGAAGTGAATA        |
| FGF5X3-640F (60)          | AAACCCAGCACATCTCTACC            |
| FGF5X3-690F (62)          | GAGCAGCCAGAACTTTCTTTTCC         |
| FGF5X3-720F (60)          | CCTGAAAAGAAAAAGCCACCTA          |
| FGF5X3-760F (58)          | GTTCCCTTTTCTGCACCT              |
| FGF5X3-800R (62)          | CCAAAGCGAACTTGAGTCTGTATT        |
| FGF5X3-750R (62)          | AGGTGCAGAAAGGGGAACCT            |
| FGF5X3-690R (58)          | GAAAGAAAGTTCTGGCTGCTC           |
| FGF5X3-610R (60)          | CTGCAGCCTCGTTTAGCTTT            |
| FGF5X3-560R (60x)         | CGTTTTTTCAGTTCTGTGATTGC         |
| FGF5X3-520R (60)          | GCGTAGGTATTATAGCTGTTTTCTTGA     |
| FGF5X3-R6R (60)           | TATACAACCTCTGAGGGGAAAGAA        |
| FGF5X3-R5R (56)           | CTCTGAAGACACCTATACAACCTCC       |
| <b>Promoter and 5'UTR</b> |                                 |
| FGF5P-1F (60)             | GGACAAGGAAAGAGGGGAAG            |
| FGF5P-1R (60)             | ATAGCCTCGGGAGAAAGAGG            |
| FGF5P-2F (60)             | TGGGAGAGGACAAGGAAAGA            |
| FGF5P-2R (60)             | GGAGAAAGAGGGGGAGAGAG            |
| FGF5P-3R (61)             | CGCCGCTTTGTGTACTCACT            |
| FGF5-5'UTR-F (62)         | CTTCGCAAGGCGTGCACTA             |
| FGF5-5'UTR-R (59)         | CTGGGGTCTTAAGGGCATC             |

Primer names include direction (F-forward, R-reverse) and approximate location on exon; L and R are 5' and 3' to the exon  
 Parentheses indicate estimated Tm for primer, and lower case x indicates design issue as indicated by Primer3: <http://frodo.wi.mit.edu/>



Table S2. Primer combinations used for PCR and sequencing of extant elephant DNA

|                    |                 |                  |                   |                  |                  |                   |                   |                  |                 |
|--------------------|-----------------|------------------|-------------------|------------------|------------------|-------------------|-------------------|------------------|-----------------|
| exon 1             | FGF5X1-R1R (62) | FGF5X1-R2R (61)  | FGF5X1-350R (54)  | FGF5X1-320R (61) | FGF5X1-290R (60) | FGF5X1-250R (65x) | FGF5X1-170R (63)  | FGF5X1-100R (61) | FGF5X1-50R (66) |
| FGF5X1-L1F (67)    | Y               | Y                |                   |                  |                  |                   |                   | Y                | Y               |
| FGF5X1-L2F (62)    | Y               | Y                |                   |                  |                  |                   |                   | Y                | Y               |
| FGF5X1-10F (60)    |                 |                  |                   |                  |                  |                   | Y                 | Y                |                 |
| FGF5X1-60F (66)    |                 |                  |                   |                  |                  | Y                 | Y                 |                  |                 |
| FGF5X1-80F (69)    |                 |                  |                   |                  |                  | Y                 | Y                 |                  |                 |
| FGF5X1-170F (62)   |                 |                  |                   |                  | Y                | Y                 |                   |                  |                 |
| FGF5X1-240F (61)   | Y               | Y                | Y                 | Y                |                  |                   |                   |                  |                 |
| FGF5X1-290F (61)   | Y               | Y                |                   |                  |                  |                   |                   |                  |                 |
| FGF5X1-300F (62)   | Y               | Y                |                   |                  |                  |                   |                   |                  |                 |
| exon 2             | FGF5X2-R3R (59) | FGF5X2-R4R (58x) | FGF5X2-460R (59)  | FGF5X2-450R (59) |                  |                   |                   |                  |                 |
| FGF5X2-L3F (58)    | Y               | Y                | Y                 | Y                |                  |                   |                   |                  |                 |
| FGF5X2-L4F (62)    | Y               | Y                | Y                 | Y                |                  |                   |                   |                  |                 |
| FGF5X2-360F (58)   | Y               | Y                | Y                 | Y                |                  |                   |                   |                  |                 |
| FGF5X2-370F (60)   | Y               | Y                | Y                 | Y                |                  |                   |                   |                  |                 |
| exon3              | FGF5X3-R5R (56) | FGF5X3-R6R (60)  | FGF5X3-800R (62)  | FGF5X3-750R (62) | FGF5X3-690R (58) | FGF5X3-610R (60)  | FGF5X3-560R (60x) | FGF5X3-520R (60) |                 |
| FGF5X3-L5F (59x)   | Y               | Y                |                   |                  |                  |                   | Y                 | Y                |                 |
| FGF5X3-L6F (59x)   | Y               | Y                |                   |                  |                  |                   | Y                 | Y                |                 |
| FGF5X3-480F (59)   |                 |                  |                   |                  |                  | Y                 | Y                 |                  |                 |
| FGF5X3-520F (57)   |                 |                  |                   |                  | Y                | Y                 |                   |                  |                 |
| FGF5X3-540F (59)   |                 |                  |                   | Y                | Y                | Y                 |                   |                  |                 |
| FGF5X3-640F (60)   |                 |                  | Y                 | Y                |                  |                   |                   |                  |                 |
| FGF5X3-690F (62)   |                 | Y                | Y                 |                  |                  |                   |                   |                  |                 |
| FGF5X3-720F (60)   | Y               | Y                |                   |                  |                  |                   |                   |                  |                 |
| FGF5X3-760F (58)   | Y               | Y                |                   |                  |                  |                   |                   |                  |                 |
| promoter and 5'UTR | FGF5P-1R (60)   | FGF5P-2R (60)    | FGF5-5'UTR-R (59) |                  |                  |                   |                   |                  |                 |
| FGF5P-1F (60)      | Y               | Y                |                   |                  |                  |                   |                   |                  |                 |
| FGF5P-2F (60)      | Y               | Y                |                   |                  |                  |                   |                   |                  |                 |
| FGF5-5'UTR-F (62)  |                 |                  | Y                 |                  |                  |                   |                   |                  |                 |

**Additional figures S1-S4 – Elephant sequences are used to show the positions of the overlapping primer pairs used to generate the sequences from the woolly mammoth for *FGF5*.**

The PCR primers are shaded in grey and the product generated for each fragment is shown as a line above the sequence with the primer combination shown. The alignment uses the top sequence as a reference. Dots indicate identity to the reference and changes are shown as the base change. The primer sequences and combinations used are shown below the sequence alignments. Figures are in this order: exon 1, exon 2, exon 3 and promoter.





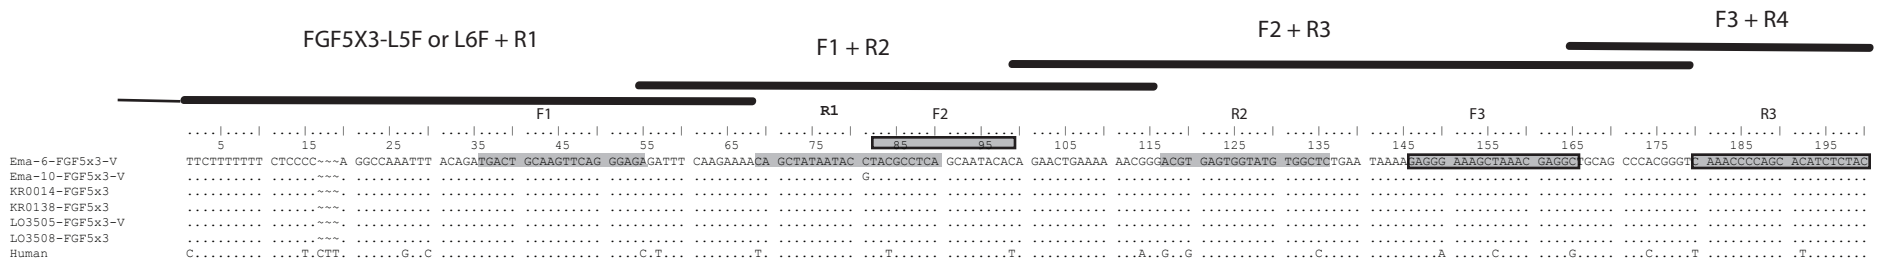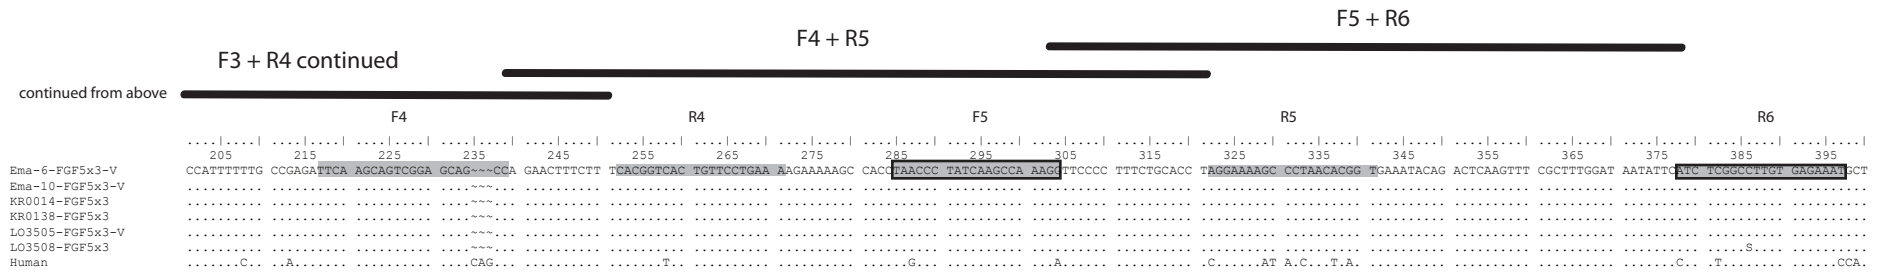

.....|.....| ..  
405  
Ema-6-FGF5x3-V TCCTTCCCCT CA  
Ema-10-FGF5x3-V ..  
KR0014-FGF5x3 ..  
KR0138-FGF5x3 ..  
LO3505-FGF5x3-V ..  
LO3508-FGF5x3 ..  
Human ..

FGF5X3-L5F  
5' CTA TTT TCA TCT CTT Ctt ttt ttC TCC 3'

FGF5X2-L6F  
5' AGG TAG AAA ATA TTA CCA CTA TTT TCA TCT C 3'

F1 5' TGA CTG CAA GTT CAG GGA GA 3'

F2 5' TAC GCC TCA GCA ATA CAC 3'

F3 5' GAG GGA AAG CTA AAC GAG GC 3'

F4 5' TTC AAG CAG TCG GAG CAG CC 3'

F5 5' TAA CCC TAT CAA GCC AAA GG 3'

R1 5' AGG CGT AGG TAT TAT AGC TG 3'

R2 5' GAG CCA CAT ACC ACT CAC GT 3'

R3 5' TAG AGA TGT GCT GGG GT T TG 3'

R4 5' TTT CAG GAA CAG TGA CCG TG 3'

R5 5' ACC GTG TTA GGG CTT TTC CT 3'

R6 5' ATT TCT CAC AAG GCC GAG AT 3'

Primer combinations:  
FGF5X3-L5F or L6F + R1  
F1 + R2  
F2 + R3  
F3 + R4  
F4 + R5  
F5 + R6

FGF5-PROM-L1 + FGF5-PROM-R1

FGF5-PROM-L2 + FGF5-PROM-R2

FGF5-PROM-L3 + FGF5-PROM-R3

```

5 | 15 | 25 | 35 | 45 | 55 | 65 | 75 | 85 | 95 | 105 | 115 | 125 | 135 | 145 | 155 | 165 | 175 | 185 | 195 |
Ema10 CAAGTTGCAA CTCTCCACAC CGGCGCTAC CCGTGGGGA CTCGATCGCT TCCGCTAGG TGAATTGCGC GATGCGCTGG TCCTGGTTGG GGGTGGCCAG GCAGCGCGTG AGA ACTGCTG GGTGCGTGG CCCCCTGTG CGGCACCCA GAGTCTGGT GCAGCTTCGC TCCGCCAGGT TCTCTCCCA CTCACTCTCT
Ema6 .....
KR138 .....
KR14 .....
LO3508 T.....

```

FGF5-PROM-L3 + FGF5-PROM-R3 continued

FGF5-PROM-L4 + FGF5-PROM-R4

FGF5-PROM-L5 + FGF5-PROM-R5

```

205 | 215 | 225 | 235 | 245 | 255 | 265 | 275 | 285 | 295 | 305 | 315 | 325 | 335 | 345 | 355 | 365 | 375 | 385 | 395 |
Ema10 CCCATCTCTT CCTCTCTTA AACACCCCGC CCTGGGGCT GCGGGCTCC CTCTATTAC CGGCCAGTGA GTACACAAG CGCGGGTGA GGGGAAGCTT CGCAGCGGTG CACTAAGCAG TGAGATCACT GGCCTATAA ATATCTGGT GCCAGAGCCG AGATCCGCTC GGTGGGCTC TCTCTCCCC TCTTTCTCCC
Ema6 .....
KR138 .....
KR14 .....
LO3508 .....

```

FGF5-PROM-L5 + FGF5-PROM-R5 continued

```

405 | 415 | 425 | 435 | 445 | 455 | 465 | 475 | 485 |
Ema10 GAGGCTATGT CCACCCGGTG CTGCGAGGGG GCGAGCCCA GAGGCACAC GCGCGCGGG GGCTACAAG CCAGGATTA GCCTGCAA
Ema6 .....
KR138 .....
KR14 .....
LO3508 .....

```

FGF5-PROM-L1

5' TGT TGT CGA GCA CCC ATT TC

FGF5-PROM-L2

5' AAT TGC GCG ATG CGC TGG TC

FGF5-PROM-L3

5' GGT GCA GCT TCG CTC CGC CA

FGF5-PROM-L4

5' GGC TCC CTC TAT TTA CCG

FGF5-PROM-L5

5' GCA GTG AGA TCA CTG GCG

FGF5-PROM-R1

5' TCT CAC GCG CTG CCT GGC CA

FGF5-PROM-R2

5' AGA GAG TGA GTG GGA GGA GA

FGF5-PROM-R3

5' GCC GCT TTG TGT ACT CAC TG

FGF5-PROM-R4

5' CTC TGG CAC CAG GAT ATT

FGF5-PROM-R5

5' GGT GTG CCT CTG GCG CTG

Primer combinations:

FGF5-PROM-L1 + FGF5-PROM-R1

FGF5-PROM-L2 + FGF5-PROM-R2

FGF5-PROM-L3 + FGF5-PROM-R3

FGF5-PROM-L4 + FGF5-PROM-R4

FGF5-PROM-L5 + FGF5-PROM-R5

**Additional figure S5 – Graphical depiction of FGF5 amino acid variation along the MAFFT alignment carried out with the G-INSi alignment algorithm with the JTT200 scoring matrix.**

Composition shows the most frequent residue in each position. Heterogeneity shows the relative residue frequency at each site. Identity allows for a quick visual identification of variable sites. Heterozygosity represents the expected heterozygosity at each residue, i.e. the sum of the squared frequencies of each amino acid at a site. “Charges” indicates whether the most frequent residue at each position is acidic, basic, or uncharged. Hydrophobicity depicts the most frequent hydrophobic, hydrophilic, and charged residues at each position.

FGF5\_Theria\_only.GINSi.fasta 30 0.02454

Amino Acids

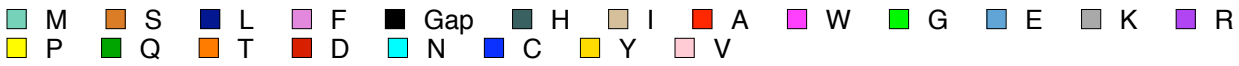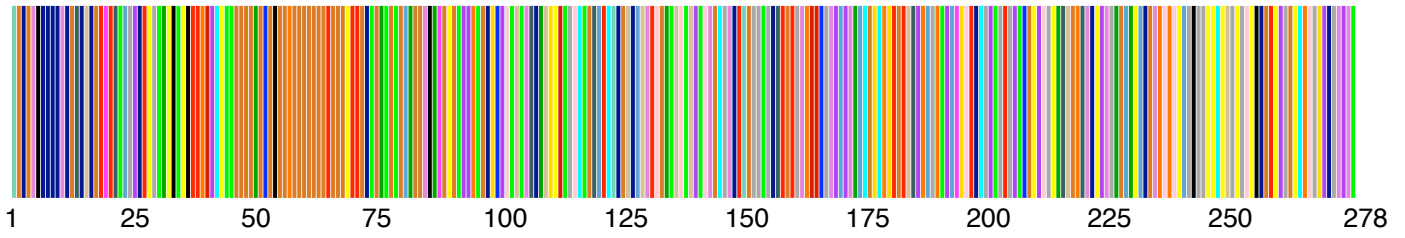

Heterogeneity

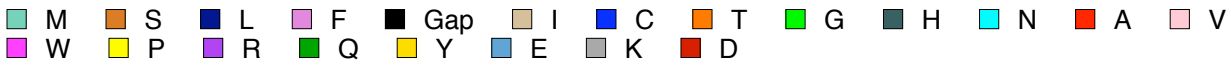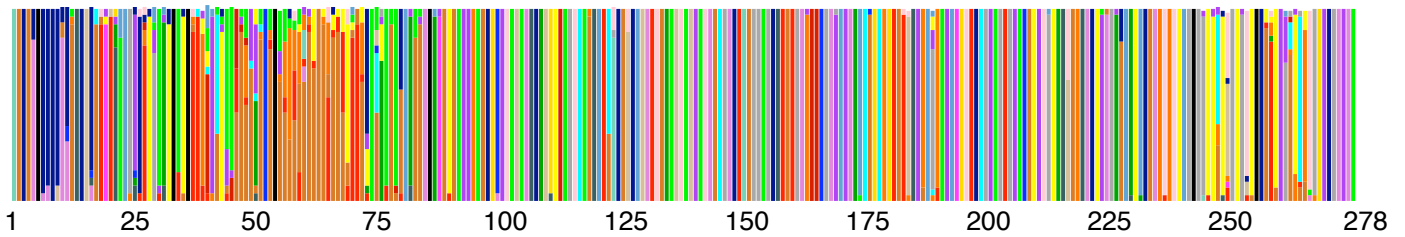

Identity

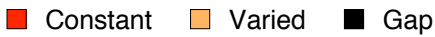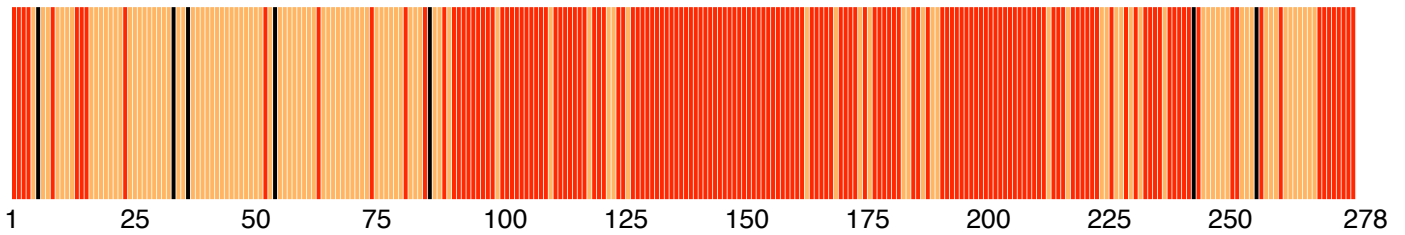

Heterozygosity

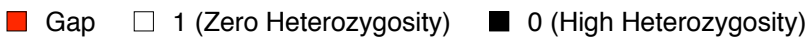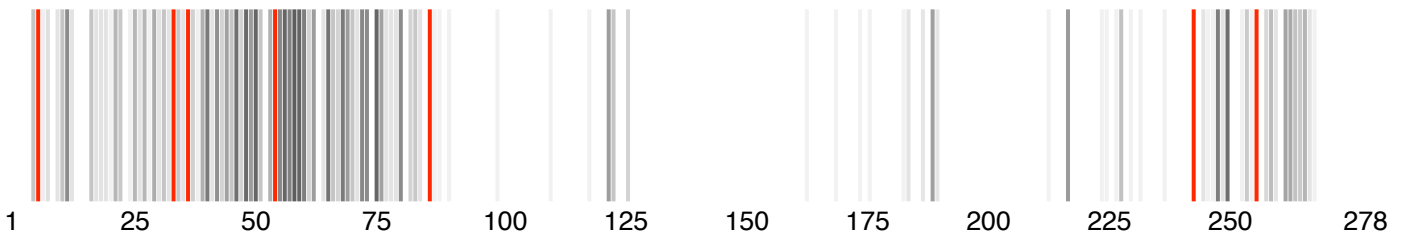



Charges

■ Uncharged ■ Gap ■ Basic ■ Acidic

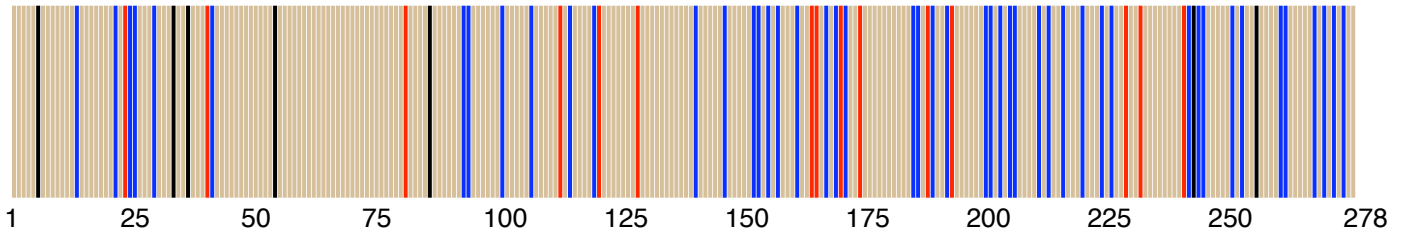

Hydrophobicity

■ Hydrophobic ■ Hydrophilic ■ Gap ■ Basic ■ Acidic

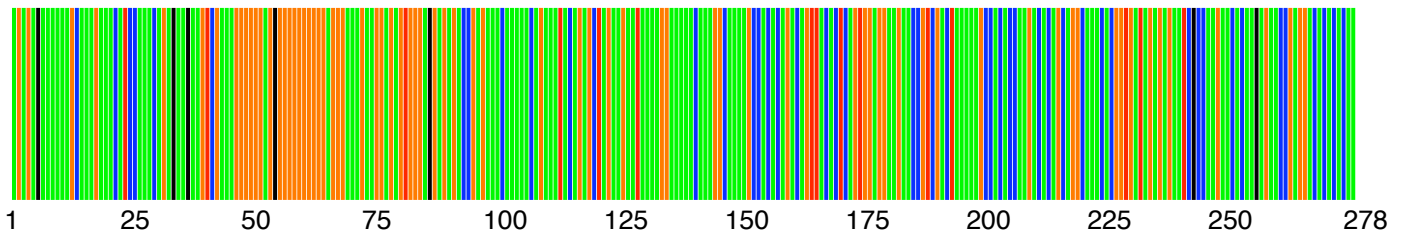

**Additional figure S6 – FGF5 amino acid sequence maximum likelihood phylogram based on the G-INSi alignment algorithm with the JTT200 scoring matrix.**

The opossum FGF5 amino acid sequence was used as outgroup. The scale bar denotes 0.05 substitutions/residue.  $\alpha = 0.32417$ . Log-likelihood = -2594.951392.

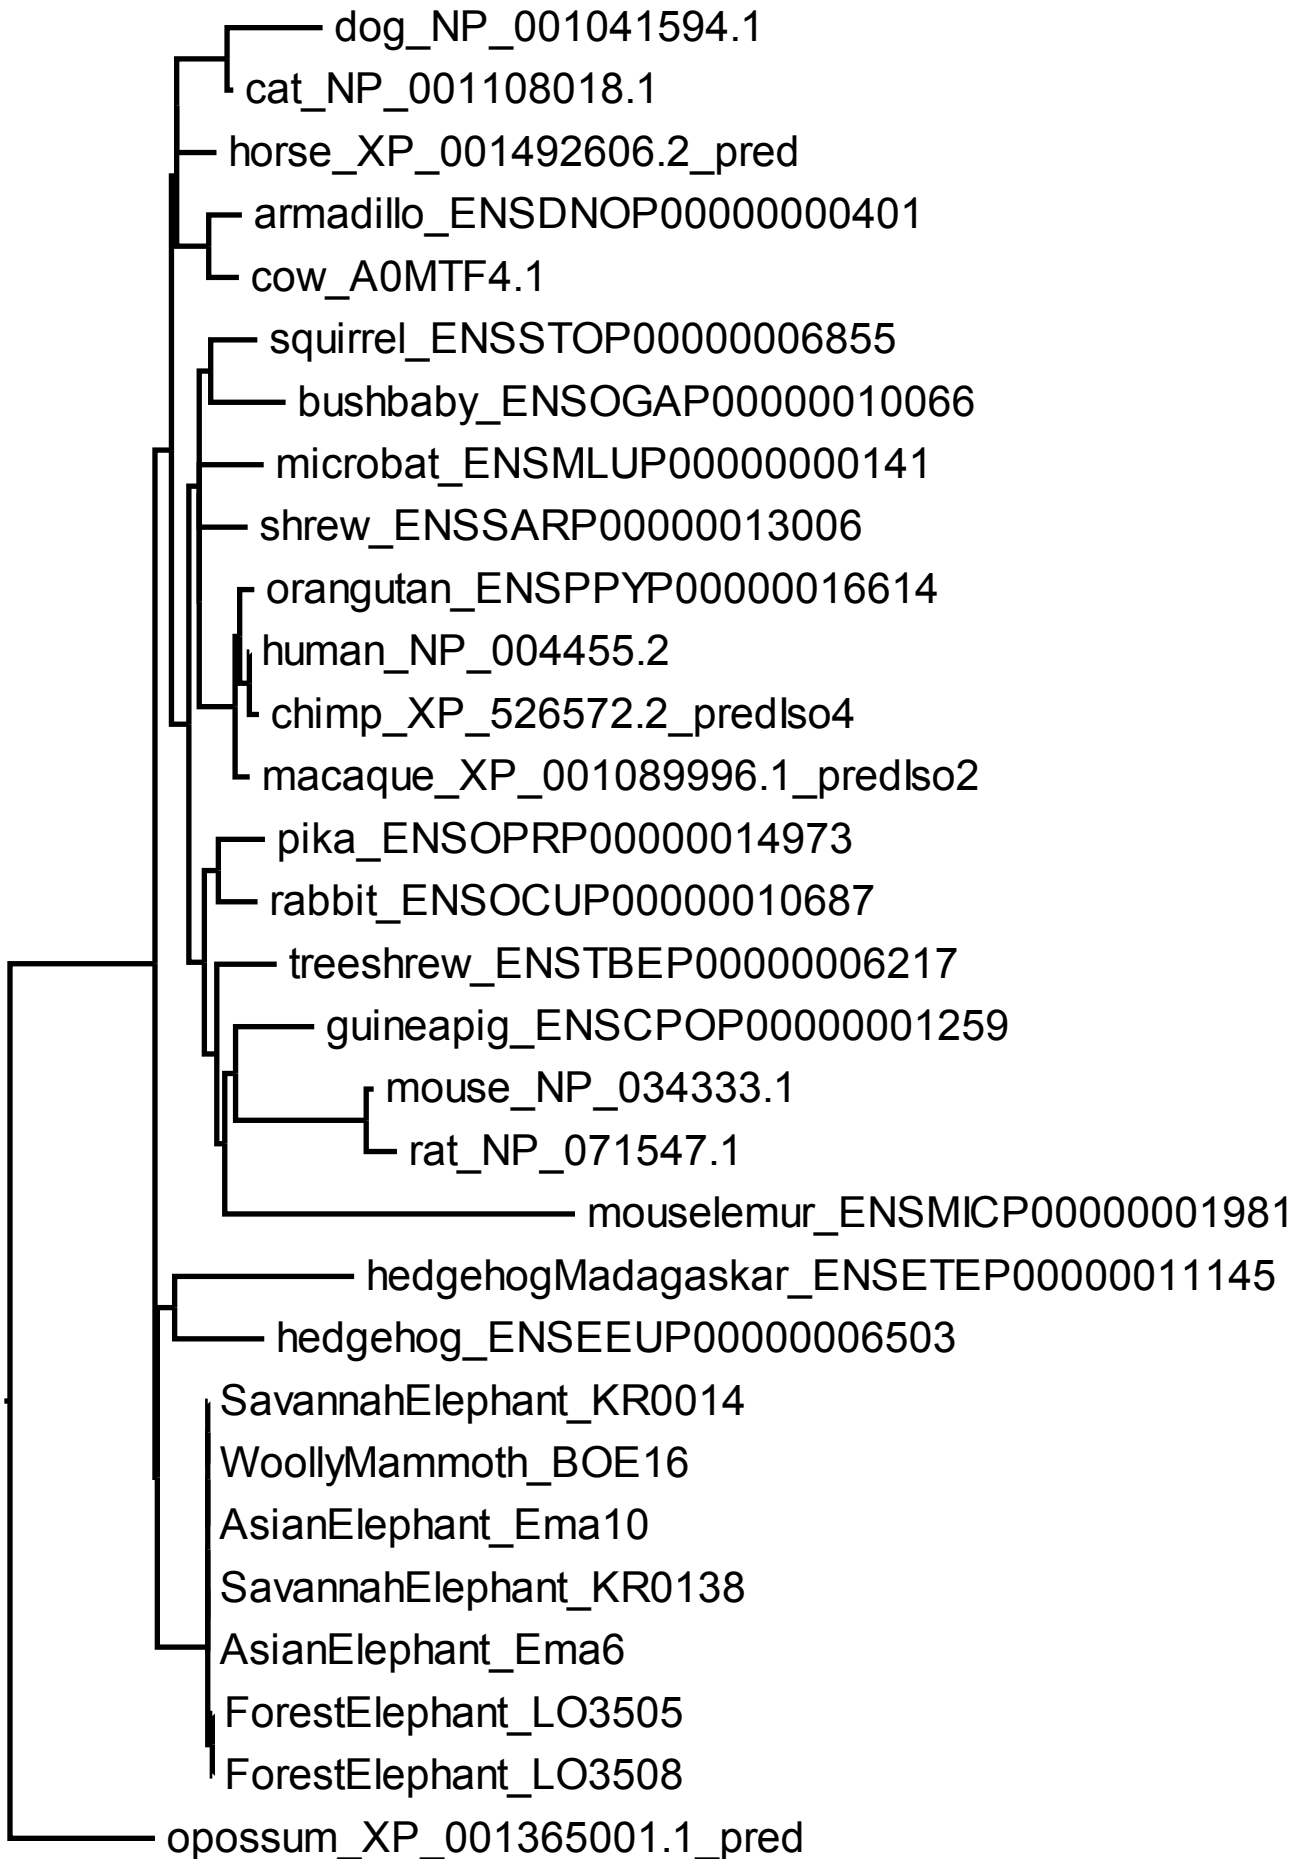

0.05

**Additional figures S7-S10 – Clone sequences from which the mammoth *FGF5* sequences were derived are shown by these figures (each shown in one figure) in the following order: exon 1, 2 and 3 (x1, x2, x3) followed by the promoter.**

Sequences are provided as an alignment in FASTA format. Modern elephant sequences determined by this study are also shown. “Ind” stands for the Indigirka mammoth. PCRs of the same fragment cloned and sequenced multiple times are designated A, B, C etc.

The clone number is shown next to the letter e.g. A.1, A.2.



GATCTACCCGGATGGCAAAGTCAATGGATCCC~ACGAAGCCAGTATG~TTAAGTAAGT  
TGCTCGCTCTTCTA-----

>KR0014-FGF5x1-V

CCCGGTGCTGCGAGGGGGGCAGCGCCAGAGGCACACCGCCGCGGGGGCTACAAAGCCC  
AGGATCAGCCCTGCAAGATGCCCTTAAGACCCCAGCGGCTGGAAGAATGAGCTTGCCTT  
CCTCCTCCTGCTCTTCCTCAGCCACCTGATCCTCAGCGCCTGGGCTCACGGAGAGAAGCG  
CCTCGCCCCAAAGGGCAACCTGGACCCGCTGCCACTGATAGGAGCCCGGAGGCGACAG  
CACCAGCCAGAGCTGCAGCAGCACCACGTCTTCCTCCTCTCCCTCCTCTACCTCCTCTGC  
CCCGGCGGCTACCCTGGGCAACCAAGGAAGCGGCTCCGAGCAGAGCAGCTTCCAGTGGAG  
CCCCTCGGGGCGCCGGACCGGCAGCCTCTACTGCAGAGTGGGCATCGGTTTCCATCTGCA  
GATCTACCCGGATGGCAAAGTCAATGGATCCC~ACGAAGCCAGTATG~TTAAGTAAGT  
TGCTCGCTCTTCTA-----

>KR0138-FGF5x1-V

CCCGGTGCTGCGAGGGGGGCAGCGCCAGAGGCACACCGCCGCGGGGGCTACAAAGCCC  
AGGATCAGCCCTGCAAGATGCCCTTAAGACCCCAGCGGCTGGAAGAATGAGCTTGCCTT  
CCTCCTCCTGCTCTTCCTCAGCCACCTGATCCTCAGCGCCTGGGCTCACGGAGAGAAGCG  
CCTCGCCCCAAAGGGCAACCTGGACCCGCTGCCACTGATAGGAGCCCGGAGGCGACAG  
CACCAGCCAGAGCTGCAGCAGCACCACGTCTTCCTCCTCTCCCTCCTCTACCTCCTCTGC  
CCCGGCGGCTACCCTGGGCAACCAAGGAAGCGGCTCCGAGCAGAGCAGCTTCCAGTGGAG  
CCCCTCGGGGCGCCGGACCGGCAGCCTCTACTGCAGAGTGGGCATCGGTTTCCATCTGCA  
GATCTACCCGGATGGCAAAGTCAATGGATCCCACGAAGCCAGTATGTTAAGTAAGTTGCT  
CGCTCTTCTA-----

-----  
-----  
-----  
>L03505-FGF5x1-V

CCCGGTGCTGCGAGGGGGCAGCGCCAGAGGCACACCGCCGCGGGGGCTACAAAGCCC  
AGGATCAGCCCTGCAAGATGCCCTTAAGACCCCAGCGGCTGGAAGAATGAGCTTGCCTT  
CCTCCTCCTGCTCTTCCTCAGCCACCTGATCCTCAGCGCCTGGGCTCACGGAGAGAAGCG  
CCTCGCCCCAAAGGGCAACCTGCACCCGCTGCCACTGATAGGAGCCCGGGAGGCGACAG  
CACCAGCCAGAGCTGCAGCAGCACACGTCTTCCTCCTCTCCCTCCTCTACCTCCTCTGC  
CCCGGCGGCTACCCTGGGCAACCAAGGAAGCGGCTCCGAGCAGAGCAGCTTCCAGTGGAG  
CCCCTCGGGGCGCCGGACCGGCAGCCTCTACTGCAGAGTGGGCATCGTTTTCCATCTGCA  
GATCTACCCGGATGGCAAAGTCAATGGATCCCACGAAGCCAGTATGTAAAGTAAGTTGCT  
CGCTCTTCTA-----  
-----  
-----  
-----  
-----  
-----  
-----  
-----  
-----  
-----  
-----

>Human

CCCGGTGCGGCGAGGGGGCAGAGCCAGAGGCACGCAGCCGCACAGGGGCTACAGAGCCC  
AGAATCAGCCCTACAAGATGCACTTAGGACCCCCGCGGCTGGAAGAATGAGCTTGCCTT  
CCTCCTCCTCCTCTTCCTCAGCCACCTGATCCTCAGCGCCTGGGCTCACGGGAGAAGCG  
TCTCGCCCCAAAGGGCAACCCGGACCCGCTGCCACTGATAGGAACCCTAGAGGCTCCAG  
CAGCAGACAGAGCAGCAGTAGCGCTATGTCTTCCTCTTCT-----GCCTCCTCCTC  
CCCCGAGCTTCTCTGGGCAGCCAAGGAAGTGGCTTGGAGCAGAGCAGTTTCCAGTGGAG  
CCCCTCGGGGCGCCGGACCGGCAGCCTCTACTGCAGAGTGGGCATCGTTTTCCATCTGCA  
GATCTACCCGGATGGCAAAGTCAATGGATCCCACGAAGCCAATATGTAAAGTGTTTTGA  
AATATTTGCT

>Ind. A1

~~~~~  
~~~~~GACCCCAGCGGCTGGAAGAATGAGCTTGCCTT  
CCTCCTCCTGCTCTTCCTCAGCCACCTGATCCTCAGCGCCTGGGCTCACGG

>Ind. A2

~~~~~  
~~~~~GACCCCAGCGGCTGGAAGAATGAGCTTGCCTT  
CCTCCTCCTGCTCTTCCTCAGCCACCTGATCCTCAGCGCCTGGGCTCACGG

>Ind. A3

~~~~~  
~~~~~GACCCCAGCGGCTGGAAGAATGAGCTTGCCTT  
CCTCCTCCTGCTCTTCCTCAGCCACCTGATCCTCAGCACCTGGGCTCACGG

>Ind. A4

~~~~~

~~~~~GACCCCAGCGGCTGGAAGAATGAGCTTGCCTT  
CCTCCTCCTGCTCTTCCTCAGCCACCTGATCCTCAGCACCTGGGCTCACGG

>Ind. A5

~~~~~GACCCCAGCGGCTGGAAGAATGAGCTTGCCTT  
CCTCCTCCTGCTCTTCCTCAGCCACCTGATCCTCAGCGCCTGGGCTCACGG

>Ind. B1

~~~~~GACCCCAGCGGCTGGAAGAATGAGCTTGCCTT  
CCTCCTCCTGCTCTTCCTCAGCCACCTGATCCTCAGCGCCTGGGCTCA~GG

>Ind. B2

~~~~~GACCCCAGCGGCTGGAAGAATGAGCTTGCCTT  
CCTCCTCCTGCTCTTCCTCAGCCACCTGATCCTCAGCGCCTGGGCTCACGG

>Ind. B3

~~~~~gaccccagcggctggaagaatgagcttgcctt  
cctcctcctgctcttcctcagccatctgatcctcagcgcctgggctcacgg

>Ind. B4

~~~~~gaccccagcggctggaagaatgagcttgcctt  
cctcctcctgctcttcctcagccacctgatcctcagcgcctgggctcacgg

>Ind. C1

~~~~~gaccccagcggctggaagaatgagcttgcctt  
cctcctcctgctcttcctcagccacctgatcctcagcgcctgggctcacgg

>Ind. C2

~~~~~gaccccagcggctggaagaatgagcttgcctt  
cctcctcctgctcttcctcagccacctgatcctcagcgcctgggctcacgg

>Ind. C3

~~~~~gaccccagcggctggaagaatgagcttgcctt  
cctcctcctgctcttcctcagccacctgatcctcagcgcctgggctcacgg

>Ind. C4

~~~~~gaccccggcggctggaagaatgagtttgcctt  
ccttctcttgctcttcctcagccacctgatcctcagcgcctgggcactcgg

>Ind. C5

~~~~~gaccccggcggctggaagaatgagcttgcctt  
cctccacctgctcttcacagccccctgatccacagcgcctgggcactcga

>Ind. A1

~~~~~ctcacggagagaagcg



cctcgcccccaaagggcaacctggacccgctgccactgataggagcccgggaggc

>Ind. A2

~~~~~  
~~~~~  
~~~~~ctcacagagagaagcg

cctcgcccccaaagggcaacctggacccgctgccactgataggagcccgggaggc

>Ind. A3

~~~~~  
~~~~~  
~~~~~ctcacggagagaagcg

cctcgcccccaaagggcaacctggacccgctgccactgataggagcccggagaagc

>Ind. A4

~~~~~  
~~~~~  
~~~~~ctcacggagagaagcg

cctcgcccccaaagggcaacctggacccgctgccactgataggagcccgggaggc

>Ind. A5

~~~~~  
~~~~~  
~~~~~ctcacggagagaagcg

cctcgcccccaaagggcaacctggacccgctgccactgataggagcccgggaggc

>Ind. B1

~~~~~  
~~~~~  
~~~~~ctcacggagagaagcg

cctcgcccccaaagggcaacctggacccgctgccactgataggagcccgggaggc

>Ind. B2

~~~~~  
~~~~~  
~~~~~ctcacggagagaagcg

cctcaccccccaaagggcaacctggacccgctgccactgataggagcccgggaggc

>Ind. A1

~~~~~  
~~~~~  
~~~~~cccgggaggcgacag

caccagccagagctgcagcagcaccacgtcttctctctctccc

>Ind. A2

~~~~~  
~~~~~  
~~~~~cccgggaggcgacag

caccagccagagctgcagcagcaccacgtcttctctctctccc

>Ind. A3

~~~~~  
~~~~~  
~~~~~

~~~~~  
~~~~~CCCgggaggcgacag  
caccagccagagctgcagcaccaccacgtcttcctcctctccc

>Ind.A4

~~~~~  
~~~~~

~~~~~CCCgggaggcgacag  
caccagccagagctgcagcaccaccacgtcttcctcctctccc

>Ind.A5

~~~~~  
~~~~~

~~~~~CCCgggaggcgacag  
caccagccagagctgcagcagcaccacgtcttcctcctctccc

>Ind.A6

~~~~~  
~~~~~

~~~~~CCCgggaggcgacag  
caccagccagagctgcagcagcaccacgtcttcctcctctccc

>Ind.A7

~~~~~  
~~~~~

~~~~~CCCgggaggcgacag  
caccagccagagctgcagcagcaccacgtcttcctcctctccc

>Ind.A8

~~~~~  
~~~~~

~~~~~CCCgggaggcgacag  
caccagccagagctgcagcagcaccacgtcttcctcctctccc

>Ind.A9

~~~~~  
~~~~~

~~~~~CCCgggaggcgacag  
caccagccagagctgcagcagcaccacgtcttcctcctctccc

>Ind.B1

~~~~~  
~~~~~

~~~~~CCCgggaggcgacag  
caccagccagagctgcagcagcaccacgtcttcctcctctccc

>Ind.B2

~~~~~  
~~~~~  
~~~~~  
~~~~~cccgggaggcgacag  
caccagccagagctgcagcagaccacgtcttcctcctctccc  
>Ind. B3

~~~~~  
~~~~~  
~~~~~cccgggaggcgacag  
caccagccagagctgcagcagaccacgtcttcctcctctccc  
>Ind. C1

~~~~~  
~~~~~  
~~~~~CCTTTTTAGGCGACAG  
CACCAGCCAGAGCTGCAGCAGACCACGTCTTCCTCCTCTCCC  
>Ind. C2

~~~~~  
~~~~~  
~~~~~CCCgggAGGCGACAG  
CACCAGCCAGAGCTGCAGCAGACCACGTCTTCCTCCTCTCCC  
>Ind. A1

~~~~~  
~~~~~  
~~~~~GTCTTCCTCCTCTCCCTCCTCTACCTCCTCTGC  
CCCggCGGCTACCCTGGTCAAACGAAGAAG  
>Ind. A2

~~~~~  
~~~~~  
~~~~~GTCTTCCTCCTCTCCCTCCTCTACCTCCTCTGC  
CCCggCGGCTACCCTGGGCATCCAAGGAAG  
>Ind. B1

~~~~~  
~~~~~  
~~~~~gtctttctcctctccctcctctacctcctctgc  
cccggcggtaccctgggcaaccaaggaag  
>Ind. C1  
~~~~~

~~~~~  
~~~~~  
~~~~~  
~~~~~gtcttcctcctctccctcctctatctcctctgc  
cccggcggctaccctgggcaaccaaggaag  
>Ind. C2

~~~~~  
~~~~~  
~~~~~  
~~~~~gtcttcctcctctccctcctctacctcctctgc  
cccggcggctaccctgggcaaccaaggaag  
>Ind. C3

~~~~~  
~~~~~  
~~~~~  
~~~~~gtcttcctcctctccctcctctacctcctctgc  
cccggcggctaccctgggcaaccaaggaag  
>Ind. C4

~~~~~  
~~~~~  
~~~~~  
~~~~~gtcttcctcctctccctcctctacctcctctgc  
cccggcggctaccctgggcaaccaaggaag  
>Ind. A1

~~~~~  
~~~~~  
~~~~~  
~~~~~GTCTTCCTCCTCTCCCTCCTCTACCTCCTCTGC  
CCCggcggctaccctgggcaaccaaggaagcggctccgagcagagcagcttccagtgag  
CCCCTCGGGCGCCGGACC  
>Ind. A2

~~~~~  
~~~~~  
~~~~~  
~~~~~GTCTTCCTCCTCTCCCTCCTCTACCTCCTCTGC  
CCCggcggctaccctgGGCAACCAAGGAAGCGGCTCCGAGCAGAGCAGCTTCCAGTGAG  
CCCCTCGGGCGCCGGACC  
>Ind. A3

~~~~~  
~~~~~  
~~~~~

~~~~~  
~~~~~GTCTTCCTCCTCTCCCTCCTCTACCTCCTCTGC  
CCCGGCGGCTACCCTGGGCAACCAAGGAAGCGGCTCCGAGCAGAGCAGCTTCCAGTGGAG  
CCCCTCGGGGCGCCGGACC

>Ind.A1

~~~~~  
~~~~~  
~~~~~

~~~~~ccaaggaagcgactccgagcagagcagcttccagtggag  
cccctcggggcgccggacc

>Ind.A2

~~~~~  
~~~~~  
~~~~~

~~~~~ccaaggaagcggctccgagcagagcagcttccagtgaag  
cccctcggggcgccggacc

>Ind.A1

~~~~~  
~~~~~  
~~~~~

~~~~~gag  
cccctcggggcgccggaccggcagcctctactgcagagtgggcatcggtttccatctgca  
gatctaccggatggcaaagtcaatggatcc

>Ind.A2

~~~~~  
~~~~~  
~~~~~

~~~~~gag  
cccctcggggcgccggaccggcagcctctactgcagagtgggcatcggtttccatctgca  
gatctaccggatggcaaagtcaatggatcc

>Ind.A3

~~~~~  
~~~~~  
~~~~~

~~~~~gag  
cccctcggggcgccggaccggcagcctctactgcagagtgggcatcggtttccatctgca

gatctaccg gatggcaaagtcaatggatcc

>Ind. B1

~~~~~  
~~~~~  
~~~~~  
~~~~~  
~~~~~  
~~~~~gag  
cccctcg gggcgccggaccggcagccttactgcagagtgggcatcggtttccatctgca  
gatctaccg gatggcaaagtcaatggatcc

>Ind. B2

~~~~~  
~~~~~  
~~~~~  
~~~~~  
~~~~~  
~~~~~gag  
cccctcg gggcgccggaccggcagccttactgcagagtgggcatcggtttccatctgca  
gatctaccg gatggcaaagtcaatggatcc

>Ind. B3

~~~~~  
~~~~~  
~~~~~  
~~~~~  
~~~~~  
~~~~~gag  
cccctcg gggcgccggaccggcagccttactgcagagtgggcatcggtttccatctgca  
gatctaccg gatggcaaagtcaatggatcc

>Ind. B4

~~~~~  
~~~~~  
~~~~~  
~~~~~  
~~~~~  
~~~~~gag  
cccctcg gggcgccggaccggcagccttactgcagagtgggcatcggtttccatctgca  
gatctaccg gatggcaaagtcaatggatcc

>Ind. B5

~~~~~  
~~~~~  
~~~~~  
~~~~~  
~~~~~  
~~~~~gag  
cccctcg gggcgccggaccggcagccttactgcagagtgggcatcggtttccatctgca  
gatctaccg gatggcaaagtcaatggatcc

>Ind. A1

~~~~~  
~~~~~  
~~~~~  
~~~~~  
~~~~~  
~~~~~  
~~~~~ctgca  
gatctaccgcatggcaaagtcaatggatccacgaagccagtatgttaagtaagttgct  
cgctcttcta

>Ind. A2

~~~~~  
~~~~~  
~~~~~  
~~~~~  
~~~~~  
~~~~~  
~~~~~ctgca  
gatctaccgcatggcaaagtcaatggatccacgaagccagtatgttaagtaagttgct  
cgctcttcta

>Ind. A3

~~~~~  
~~~~~  
~~~~~  
~~~~~  
~~~~~  
~~~~~  
~~~~~ctgca  
gatctaccgcatggcgaagtcaatggatccacgaagccagtatgttaagtaagttgct  
cgctcttcta

>Ind. B1

~~~~~  
~~~~~  
~~~~~  
~~~~~  
~~~~~  
~~~~~  
~~~~~ctgca  
gatctaccgcatggcaaagtcaatggatccacgaagccagtatgttaagtaagttgct  
cgctcttcta

>Ind. B2

~~~~~  
~~~~~  
~~~~~  
~~~~~  
~~~~~

~~~~~  
~~~~~ctgca  
gatctacccggatggcaaagtcaatggatcccacgaagccagtatgttaagtaagttgct  
cgctcttcta



>Ema-10-FGF5x2

GATTTCTGTCATCCTAGGTATTTTGGAAATATTTGCTGTGTCTCAGGGGATCGTAGGAAT  
ACGAGGAGTTTTAGCAACAAATTTTAGCCATGTCAAAAAAGGAAAACCCACGCAAG  
TGTA

>L03505-FGF5x2

GATTTCTGTCATCCTAGGTATTTTGGAAATATTTGCTGTGTCTCAGGGGATCGTAGGAAT  
ACGAGGAGTTTTAGCAACAAATTTTAGCCATGTCAAAAAAGGAAAACCCACGCAAG  
TGTA

>KR0014-FGF5x2

GATTTCTGTCATCCTAGGTATTTTGGAAATATTTGCTGTGTCTCAGGGGATCGTAGGAAT  
ACGAGGAGTTTTAGCAACAAATTTTAGCCATGTCAAAAAAGGAAAACCCACGCAAG  
TGTA

>Human

GATTTCTGTCATCCTAGGTGTTTTGGAAATATTTGCTGTGTCTCAGGGGATTGTAGGAAT  
ACGAGGAGTTTTAGCAACAAATTTTAGCGATGTCAAAAAAGGAAAACCCATGCAAG  
TGTA

>Ind. A1

gatttctgtcatcctaggtatTTTTGGAAATATTTGCTGTGTCTCAGGGGATCGTAGGAAT  
acgaggagTTTTAGCAACAAATTTTAGCGATGTCAAAAAAGGAAAACCCATGCAAG

>Ind. A2

gatttctgtcatcctaggtatTTTTGGAAATATTTGCTGTGTCTCAGGGGATCGTAGGAAT  
acgaggagTTTTAGCAACAAATTTTAGCGATGTCAAAAAAGGAAAACCCATGCAAG

>Ind. A3

gatttctgtcatcctaggtatTTTTGGAAATATTTGCTGTGTCTCAGGGGATCGTAGGAAT  
acgaggagTTTTAGCAACAAATTTTAGCGATGTCAAAAAAGGAAAACCCATGCAAG

>Ind. A1

~~~~~ctaggtatTTTTGGAAATATTTGCCGTGTCTCAGGGGATCGTAGGAAT  
acgaggagTTTTAGCAACAAATTTTAGCGATGTCAAAAAAGGAAAACCCATGCAAG

>Ind. A2

~~~~~ctaggtatTTTTGGAAATATTTGCTGTGTCTCAGGGAATCGTAGGAAT  
acgaggagTTTTAGCAACAAATTTTAGCGATGTCAAAAAAGGAAAACCCATGCAAG

>Ind. A1

~~~~~gtaggaat  
acgaggagTTTTAGCAACAAATTTTAGCCATGTCAAAAAAGGAAAACCCACGCAAG  
tgtaa

>Ind. A2

~~~~~gtaggaat  
acgaggagTTTTAGCAACAAATTTTAGCCATGTCAAAAAAGGAAAACCCACGCAAG  
tataa

>Ind. A3

~~~~~gtaggaat  
acgaggagTTTTAGCAACAAATTTTAGCCATGTCAAAAAAGGAAAACCCACGCAAG  
tgtaa

>Ind. A4

~~~~~gtaggaat  
acgaggagTTTTAGCAACAAATTTTAGCCATGTCAAAAAAGGAAAACCCACGCAAG

>Ind. A5

~~~~~gtaggaat  
acgaggagttttcagcaacacccttttagccatgtcaaaaaaggaaaactccacgcaag  
tgtaa

>Ind. A6

~~~~~gtaggaat  
acgaggagttttcagcaacaaattttagccatgtcaaaaaaggaaaactccacgcaag  
tgtaa

>Ind. A7

~~~~~gtaggaat  
acgaggagttttcagcaacaaattttagccatgtcaaaaaaggaaaactccacgcaag  
tgtaa

>Ind. B1

~~~~~gtaagaat  
acgaggagttttcagcaacaaattttagccatgtcaaaaaaggaaaactccacgcaag  
tgtaa

>Ind. C1

~~~~~gtaggaat  
acgaggagttttcagcaacaaattttagccatgtcaaaaaaggaaaactccacgcaag  
tgtaa

>Ind. C2

~~~~~gtaggaat  
acgaggagtcttcagcaacaaattttagccatgtcaaaaaaggaaaactccacgcaag  
tgtaa

>Ind. C3

~~~~~gtaggaat  
acgaggagttttcagcaacaaattttagccatgtcaaaaaaggaaaactccacgcaag  
tgtaa

>Ind. C4

~~~~~gtaggaat  
acgaggagttttcagcaacaaattttagccatgtcaaaaaaggaaaactccacgcaag  
tgtaa

>Jarkov. A1

~~~~~ctaggtatTTTtgaaatatttgctgtgtctcaggggatcgtaggaat  
acgaggagttttcagcaacaaatTTTtagc

>Jarkov. A2

~~~~~ctaggtatTTTtgaaatatttgctgtgtctcaggggatcgtaggaat  
acgaggagttttcagcaacaaatTTTtagc

>Jarkov. A1

~~~~~gtaggaat  
acgaggagttttcagcaacaaatTTTtagcgatgtcaaaaaaggaaaactccatgcaag  
tgtaa

>Jarkov. A2

~~~~~gtaggaat  
acgaggagttttcagcaacaaatTTTtagcgatgtcaaaaaaggaaaactccatgcaag  
tgtaa

>Jarkov.A3

~~~~~gtaggaat  
acgaggagttttcagcaacaaatTTTTtagcgatgtcaaaaaaggaaaactccatgcaag  
tgtaa

>Jarkov.A4

~~~~~gtaggaat  
acggggagttttcagcaacaaatTTTTtagcgatgtcaaaaaaggaaaactccatgcaag  
tgtaa

>Jarkov.A5

~~~~~gtaggaat  
acgaggagttttcagcaacaaatTTTTtagcgatgtcaaaaaaggaaaactccatgcaag  
tgtaa

>Jarkov.A6

~~~~~gtaggaat  
acgaggagttttcagcaacaaatTTTTtagcgatgtcaaaaaaggaaaactccatgcaag  
tgtaa

>Jarkov.A7

~~~~~gtaggaat  
acgaggagttttcagcaacaaatTTTTtagcgatgtcaaaaaaggaaaactccatgcaag  
tgtaa

>Jarkov.A8

~~~~~gtaggaat  
acgaggagttttcagcaacaaatTTTTtagcgatgtcaaaaaaggaaaactccatgcaag  
tgtaa

>Jarkov.B1

~~~~~gtaggaat  
acgaggagttttcagcaacaaatTTTTtagcgatgtcaaaaaaggaaaactccatgcaag  
tgtaa

>Jarkov.B2

~~~~~gtaggaat  
acgaggagttttcagcaacaaatTTTTtagcgatgtcaaaaaaggaaaactccatgcaag  
tgtaa

>10B.6

gtaggaatacaggagttttcagcaacaaatTTTTtagccatgtcaaaaaaggaaaactc  
cacgcaagtgttaa

>Ema-6-FGF5x3-V

TTCTTTTTTTCTCCCC~~~AGGCCAAATTTACAGATGACTGCAAGTTCAGGGAGAGATTT  
CAAGAAAACAGCTATAATACCTACGCCTCAGCAATACACAGAAGCTGAAAAAACGG~GACG  
TGAGTGGTATGTGGCTCTGAATAAAAGAGGGAAAGCTAAACGAGGCTGCAGCCCACGGGT  
CAAACCCAGCACATCTCTACCCATTTTTTTGCCGAGATTCAAGCAGTCGGAGCAG~~~CC  
AGAAGTTTCTTTCACGGTCACTG~TTCCTGAAAAGAAAAAGCCACCTAACCCCTATCAAGC  
CAAAGTTTCCCCTTTCTGCACCTAGGAAAAGCCCTAACACGGTGAAATACAGACTCAAGT  
TTCGCTTTGGATAATATTCATCTCGGCCTTGTGAGAAATGCTTCTTTCCCCTCA

>Ema-10-FGF5x3-V

TTCTTTTTTTCTCCCC~~~AGGCCAAATTTACAGATGACTGCAAGTTCAGGGAGAGATTT  
CAAGAAAACAGCTATAATACCTACGCCTCAGCAATACACAGAAGCTGAAAAAACGG~GACG  
TGAGTGGTATGTGGCTCTGAATAAAAGAGGGAAAGCTAAACGAGGCTGCAGCCCACGGGT  
CAAACCCAGCACATCTCTACCCATTTTTTTGCCGAGATTCAAGCAGTCGGAGCAG~~~CC  
AGAAGTTTCTTTCACGGTCACTG~TTCCTGAAAAGAAAAAGCCACCTAACCCCTATCAAGC  
CAAAGTTTCCCCTTTCTGCACCTAGGAAAAGCCCTAACACGGTGAAATACAGACTCAAGT  
TTCGCTTTGGATAATATTCATCTCGGCCTTGTGAGAAATGCTTCTTTCCCCTCA

>KR0014-FGF5x3

TTCTTTTTTTCTCCCC~~~AGGCCAAATTTACAGATGACTGCAAGTTCAGGGAGAGATTT  
CAAGAAAACAGCTATAATACCTACGCCTCAGCAATACACAGAAGCTGAAAAAACGG~GACG  
TGAGTGGTATGTGGCTCTGAATAAAAGAGGGAAAGCTAAACGAGGCTGCAGCCCACGGGT  
CAAACCCAGCACATCTCTACCCATTTTTTTGCCGAGATTCAAGCAGTCGGAGCAG~~~CC  
AGAAGTTTCTTTCACGGTCACTG~TTCCTGAAAAGAAAAAGCCACCTAACCCCTATCAAGC  
CAAAGTTTCCCCTTTCTGCACCTAGGAAAAGCCCTAACACGGTGAAATACAGACTCAAGT  
TTCGCTTTGGATAATATTCATCTCGGCCTTGTGAGAAATGCTTCTTTCCCCTCA

>KR0138-FGF5x3

TTCTTTTTTTCTCCCC~~~AGGCCAAATTTACAGATGACTGCAAGTTCAGGGAGAGATTT  
CAAGAAAACAGCTATAATACCTACGCCTCAGCAATACACAGAAGCTGAAAAAACGG~GACG  
TGAGTGGTATGTGGCTCTGAATAAAAGAGGGAAAGCTAAACGAGGCTGCAGCCCACGGGT  
CAAACCCAGCACATCTCTACCCATTTTTTTGCCGAGATTCAAGCAGTCGGAGCAG~~~CC  
AGAAGTTTCTTTCACGGTCACTG~TTCCTGAAAAGAAAAAGCCACCTAACCCCTATCAAGC  
CAAAGTTTCCCCTTTCTGCACCTAGGAAAAGCCCTAACACGGTGAAATACAGACTCAAGT  
TTCGCTTTGGATAATATTCATCTCGGCCTTGTGAGAAATGCTTCTTTCCCCTCA

>L03505-FGF5x3-V

TTCTTTTTTTCTCCCC~~~AGGCCAAATTTACAGATGACTGCAAGTTCAGGGAGAGATTT  
CAAGAAAACAGCTATAATACCTACGCCTCAGCAATACACAGAAGCTGAAAAAACGG~GACG  
TGAGTGGTATGTGGCTCTGAATAAAAGAGGGAAAGCTAAACGAGGCTGCAGCCCACGGGT  
CAAACCCAGCACATCTCTACCCATTTTTTTGCCGAGATTCAAGCAGTCGGAGCAG~~~CC  
AGAAGTTTCTTTCACGGTCACTG~TTCCTGAAAAGAAAAAGCCACCTAACCCCTATCAAGC  
CAAAGTTTCCCCTTTCTGCACCTAGGAAAAGCCCTAACACGGTGAAATACAGACTCAAGT  
TTCGCTTTGGATAATATTCATCTCGGCCTTGTGAGAAATGCTTCTTTCCCCTCA

>L03508-FGF5x3

TTCTTTTTTTCTCCCC~~~AGGCCAAATTTACAGATGACTGCAAGTTCAGGGAGAGATTT  
CAAGAAAACAGCTATAATACCTACGCCTCAGCAATACACAGAAGCTGAAAAAACGG~GACG  
TGAGTGGTATGTGGCTCTGAATAAAAGAGGGAAAGCTAAACGAGGCTGCAGCCCACGGGT  
CAAACCCAGCACATCTCTACCCATTTTTTTGCCGAGATTCAAGCAGTCGGAGCAG~~~CC  
AGAAGTTTCTTTCACGGTCACTG~TTCCTGAAAAGAAAAAGCCACCTAACCCCTATCAAGC

CAAAGGTTCCCCTTTCTGCACCTAGGAAAAGCCCTAACACGGTGAAATACAGACTCAAGT  
TTCGCTTTGGATAATATTCATCTCGGCSTTGTGAGAAATGCTTCTTTCCCCTCA

>Human

CTCTTTTTTTCTCCTCCTTAGGCCAAGTTCACAGATGACTGCAAGTTCAGGGAGCGTTTT  
CAAGAAAATAGCTATAATACCTATGCCTCAGCAATACATAGAAGTGAACAAACAG~GGCG  
GGAGTGGTATGTGGCCCTGAATAAAAGAGGAAAAGCCAAACGAGGGTGCAGCCCCGGGT  
TAAACCCAGCATATCTCTACCCATTTCTGCCAAGATTCAAGCAGTCGGAGCAGCAGCC  
AGAAGTTTCTTTCACGGTACTG~TTCCTGAAAAGAAAAGCCACCTAGCCCTATCAAGC  
CAAAGATTCCCCTTTCTGCACCTCGGAAAATACCAACTCAGTGAATACAGACTCAAGT  
TTCGCTTTGGATAATATTCCTCTTGGCCTTGTGAGAAACCATTCTTTCCCCTCA

>Ind. A1

ttctttttttctcccc~~~agaccaaatttacagatgactgcaagttcagggagagattt  
caagaaaa

>Ind. A2

ttctttttttctcccc~~~aggccaaatttacagatgactgcaagttcagggagagattt  
caagaaaa

>Ind. A3

ttctttttttctcccc~~~aggccaaatttacagatgactgcaagttcagggagagattt  
caagaaaa

>Ind. A4

ttctttttttctcccc~~~aggccaaatttacagatgactgcaagttcagggagagattt  
caagaaaa

>Ind. A5

ttctttttttctcccc~~~aggccaaatttacagatgactgcaagttcagggagagattt  
caagaaaa

>Ind. A6

ttctttttttctcccc~~~aggccaaatttacagatgactgcaagttcagggagagattt  
caagaaaa

>Ind. A7

ttctttttttctcccc~~~aggccaaatttacagatgactgcaagttcagggagagattt  
caagaaaa

>Ind. A8

ttctttttttctcccc~~~aggccaaatttacagatgactgcaagttcagggagagattt  
caagaaaa

>Ind. B1

ttctttttttctcccc~~~aggccaaatttacagatgactgcaagttcagggagagattt  
caagaaaa

>Ind. B2

ttctttttttctcccc~~~aggccaaatttacagatgactgcaagttcagggagagattt  
caagaaaa

>Ind. B3

ttctttttttctcccc~~~aggccaaatttacagatgactgcaagttcagggagagattt  
caagaaaa

>Ind. B4

ttctttttttctcccc~~~aggccaaatttacagatgactgcaagttcagggagagattt  
caagaaaa

>Ind. B5  
ttctttttttctcccc~~~aggccaaatttacagaagactgcaagttcagggagagattt  
caagaaaa

>Ind. B6  
ttctttttttctcccc~~~aggccaaatttacagatgactgcaagttcagggagagattt  
caagaaaa

>Ind. B7  
ttctttttttctcccc~~~aggccaaatttacagatgactgcaagttcagggagagattt  
caagaaaa

>Ind. B8  
ttctttttttctcccc~~~aggccaaatttacagatgactgcaagttcagggagagattt  
caagaaaa

>Ind. A1  
ttctttttttctcccc~~~aggccaaatttacagatgactgcaagttcagggagagattt  
caagaaaa

>Ind. A2  
ttctttttttctcccc~~~aggccaaatttacagatgactgctagttcagggagagattt  
caagaaaa

>Ind. A3  
ttctttttttctcccc~~~aggccaaatttacagatgactgcaagttcagggagagattt  
caagaaaa

>Ind. A4  
ttctttttttctcccc~~~aggccaaatttacagatgactgcaagttcagggagagattt  
caagaaaa

>Ind. A5  
ttctttttttctcccc~~~aggccaaatttacagatgactgcaagttcagggagagattt  
caagaaaa

>Ind. A6  
ttctttttttctcccc~~~aggccaaatttacagatgactgcaagttcagggagagattt  
caagaaaa

>Ind. A7  
ttctttttttctcccc~~~aggccaaatttacagatgactgcaagttcagggagagattt  
caagaaaa

>Ind. A8  
ttctttttttctcccc~~~aggccaaatttacagatgactgcaagttcagggagagattt  
caagaaaa

>Ind. A1  
~~~~~gattt  
caagaaaacagctataatacctacgcctcagcaatacacagaactgaaaaaacag~g

>Ind. A2  
~~~~~gattt  
caagaaaacagctataatacctacgcctcagcaatacacagaactgaaaaaacag~g

>Ind. A3  
~~~~~gattt  
caagaaaacagctataatacctacgcctcagcaatacacagaactgaaaaaacag~g

>Ind. A4

~~~~~gattt  
caagaaaacagctataatacctacgcctcagcaatacacagaactgaaaaaacag~g  
>Ind.A5

~~~~~gattt  
caagaaaacagctataatacctacgcctcagcaatacacagaactgaaaaaacag~g  
>Ind.A6

~~~~~gattt  
caagaaaacaactataatacctacgcctcagcaatacacagaactgaaaaaacag~g  
>Ind.A7

~~~~~gattt  
caagaaaacagctataatacctacgcctcagcaatacacagaactgaaaaaacag~g  
>Ind.A8

~~~~~gattt  
caagaaaacagctataatacctacgcctcagcaatacacagaactgaaaaaacag~g  
>Ind.B1

~~~~~gattt  
caagaaaacagctataatacctacgcctcagcaatacacagaactgaaaaaacag~g  
>Ind.B2

~~~~~gattt  
caagaaaacagctataatacctacgcctcagcaatacacagaactgaaaaaacag~g  
>Ind.B3

~~~~~gattt  
caagaaaacagctataatacctacgcctcagcaatacacagaactgaaaaaacag~g  
>Ind.A1

~~~~~AGAACTGAAAAAACAG~GACG  
TGAGTGGTATGTGGCTCTGAATAAAAGAGGGAAAGCTAAACGAGGCTGCAGCCCACGGGT

>Ind.A2

~~~~~AGAACTGAAAAAACAG~GACG  
TGAGTGGTATGTGGCTCTGAATAAAAGAGGGAAAGCTAAACGAGGCTGCAGCCCACGGGT

>Ind.A3

~~~~~AGAACTGAAAAAACAG~GACG  
TGAGTGGTATGTGGCTCTGAATAAAAGAGGGAAAGCTAAATGAGGCTGCAGCCCACGGGT

>Ind.A4

~~~~~AGAACTGAAAAAACAG~GACG  
TGAGTGGTATGTGGCTCTGAATAAAAGAGGGAAAGCTAAACGAGGCTGCAGCCCACGGGT

>Ind.B1

~~~~~AGAACTGAAAAAACAG~GACG

TGAGTGGTATGTGGCTCTGAATAAAAGAGGGAAAGCTAAACGAGGCTGCAGCCCACGGGT

>Ind. B2

~~~~~  
~~~~~AGAACTGAAAAACCCTGACG  
TGAGTGGTATGTGGCTCTGAATAAAAGAGGGAAAGCTAAACGAGGCTGCAGCCCACAGGT

>Ind. B3

~~~~~  
~~~~~AGAACTGAAAAACAG~GACG  
TGAGTGGTATGTGGCTCTGAATAAAAGAGGGAAAGCTAAACGAGGCTGCAGCCCACAGGT

>Ind. C1

~~~~~  
~~~~~agaactgaaaaaacag~gacg  
tgagtggatgtggctctgaataaaagagggaaagctaaacgaggctgcagcccacgggt

>Ind. C2

~~~~~  
~~~~~agaactgaaaaaacag~gacg  
tgagtggatgtggctctgaataaaagagggaaagctaaacgaggctgcagcccacgggt

>Ind. C3

~~~~~  
~~~~~agaactgaaaaaacag~gacg  
tgagtggatgtggctctgaataaaagagggaaagctaaacgaggctgcagcccacgggt

>Ind. C4

~~~~~  
~~~~~agaactgaaaaaacag~gacg  
tgagtggatgtggctctgaataaaagagggaaagctaaacgaggctgcagcccacgggt

>Ind. A1

~~~~~  
~~~~~  
~~~~~tcagcccacgggt  
caaaccagcacatctctaccattttttgccgagattcaagcagtcggagcag~~cc  
agaactttcttt

>Ind. A2

~~~~~  
~~~~~  
~~~~~tcagcccacgggt  
caaaccagcacatctctaccattttttgccgagattcaagcagtcggagcag~~cc  
agaactttcttt

>Ind. A3

~~~~~



~~~~~  
~~~~~tgagcccacgggt  
caaacccagcacatctctaccattttttgccgagattcaagcagtcggagcag~~~cc  
agaactttcttt

>Ind.A4

~~~~~  
~~~~~tgagcccacgggt  
caaacccagcacatctctaccattttttgccgagattcaagcagtcggagcag~~~cc  
agaactttcttt

>Ind.A5

~~~~~  
~~~~~tgagcccacgggt  
caaacccagcacatctctaccattttttgccgaaaagcaagcagtcggagcag~~~cc  
agaactttcttt

>Ind.A6

~~~~~  
~~~~~tgagcccacgggt  
caaacccagcacatctctaccattttttgccgagattcaagcagtcggagcag~~~cc  
agaactttcttt

>Ind.A7

~~~~~  
~~~~~tgagcccacgggt  
caaacccagcacatctctaccattttttgccgagattcaagcagtcggagcag~~~cc  
agaactttcttt

>Ind.A8

~~~~~  
~~~~~tgagcccacgggt  
caaacccagcacatctctaccattttttgccgagattcaagcagtcggagcag~~~cc  
agaactttcttt

>Ind.B1

~~~~~  
~~~~~tgagcccacgggt  
caaacccagcacatctctaccattttttgccgagattcaagcagtcggagcag~~~cc  
agaactttcttt

>Ind.B2

~~~~~  
~~~~~tgagcccacgggt  
caaacccagcacatctctaccattttttgccgagattcaagcagtcggagcag~~~cc  
agaactttcttt

>Ind. B3

~~~~~  
~~~~~  
~~~~~  
~~~~~tgcagcccacgggt  
caaactccagcacatctctacccatTTTTTgccgagattcaagcagtcggggcag~~~cc  
agaactttcttt

>Ind. B4

~~~~~  
~~~~~  
~~~~~  
~~~~~tgcagcccacgggt  
caaaccccagcacatctctacccatTTTTTgccgagattcaagcagtcggagcag~~~cc  
agaactttcttt

>Ind. A1

~~~~~  
~~~~~  
~~~~~  
~~~~~  
~~~~~agaactttctttcacggtcactg~ttcctgaaaagaaaaagccacctaaccctatcaagc  
caaagggtcccctttctgcacct

>Ind. A2

~~~~~  
~~~~~  
~~~~~  
~~~~~  
~~~~~agaactttctttcacggtcactg~ttcctgaaaagaaaaagccacctaaccctatcaagc  
caaagggtcccctttctgcacct

>Ind. A3

~~~~~  
~~~~~  
~~~~~  
~~~~~  
~~~~~agaactttctttcacggtcactgnttcctgaaaagaaaaagccacctaaccctatcaagc  
caaagggtcccctttctgcacct

>Ind. A4

~~~~~  
~~~~~  
~~~~~  
~~~~~  
~~~~~agaactttctttcacggtcactg~ttcctgaaaagaaaaagccacctaaccctatcaagc  
caaagggtcccattctgcacct

>Ind. B1

~~~~~  
~~~~~  
~~~~~  
~~~~~  
~~~~~agaactttctttcacggtcactg~ttcctgaaaagaaaaagccacctaaccctatcaagc





~~~~~ttcccctttctgcacctaggaaaagccctaacacggtgaaatacagactcaagt  
ttcgctttggataatattc

>Ind.B2

~~~~~  
~~~~~  
~~~~~  
~~~~~

~~~~~ttcccctttctgcacctaggaaaagccctaacacggtgaaatacagactcaagt  
ttcgctttggataatattc

>Ind.B3

~~~~~  
~~~~~  
~~~~~  
~~~~~

~~~~~ttcccctttctgcacctaggaaaagccctaacacggtgaaatacagactcaagt  
ttcgctttggataatattc

>Ind.A1

~~~~~  
~~~~~  
~~~~~  
~~~~~

~~~~~ttcccctttctgcacctaggaaaagccctaacacgatgaaatacagactcaagt  
ttcgctttggataatattc

>Ind.A2

~~~~~  
~~~~~  
~~~~~  
~~~~~

~~~~~ttcccctttctgcacctaggaaaagccctaacacgatgaaatacagactcaagt  
ttcgctttggataatattc

>Ind.A3

~~~~~  
~~~~~  
~~~~~  
~~~~~

~~~~~ttcccctttctgcacctaggaaaagccctaacacgatgaaatacagactcaagt  
ttcgctttggataatattc

>Ind.A4

~~~~~  
~~~~~  
~~~~~

~~~~~  
~~~~~  
~~~~~ttcccctttctgcacctaggaaaagccctaacacggtgaaatacagactcaagt  
ttcgctttggataatattc  
>Ind.A5

~~~~~  
~~~~~  
~~~~~  
~~~~~  
~~~~~ttcccctttctgcacctaggaaaagccctaacacggtgaaatacagactcaagt  
ttcgctttggataatattc  
>Ind.A6

~~~~~  
~~~~~  
~~~~~  
~~~~~  
~~~~~ttcccctttctgcacctaggaaaagccctaacacggtgaaatacagactcaagt  
ttcgctttggataatattc  
>Ind.A7

~~~~~  
~~~~~  
~~~~~  
~~~~~  
~~~~~ttcccctttctgcacctaggaaaagccctaacacggtgaaatacagactcaagt  
ttcgctttggataatattc  
>Ind.A8

~~~~~  
~~~~~  
~~~~~  
~~~~~  
~~~~~ttcccctttctgcacctaggaaaagccctaacacggtgaaatacagactcaagt  
ttcgctttggataatattc

>Ema10-promoter-5' UTR

GGGGGAGATGTTGTCGAGCACCCATTTCCAAGTTGCAACTCTCCACACCCGGCCGCTACCC  
GTGGGGGACTCGATCGCTTCCGCTAGGCTGAATTGCGCGATGCGCTGGT~CCTGG~TTGG  
GGGTGGCCAGGCAGCGCGTG~AGAACTGCTGGGGTGCGTGG~CCCCGGTGTGCGCGCACC  
CAGAGTCTGGGTGCAGCTTCGCTCCGCCAGGTTCTCC~TCCCCTCACTCTCTCCCATCT  
CCTCCCTCCTCTAAACACCCCG~CCCCTGGGGCTGCGGGGCTCCCTCTATTTACCGGCCA  
G~TGAGTACACAAAGCGGCGGGTG~AGGGG~AAGCTTCGCAGGCGTGCACTAAGCAGTGA  
GATCACTGGCGTTATAAATATCCTGGTGCCAGAGCCGAGATCCGCTCGGGTGGCCTCTCT  
CTCCCCCTCTTTCT~CCCGAGG~CTATGT~CCACCCGGTGTGCGAGGGGGGCAGCGCCA  
GAGGCACACCCGCCGCGGGGGCTACAAAGCCCAGGATTAGCCCTGCAA

>Ema6-promoter-5' UTR

GGGGGAGATGTTGTCGAGCACCCATTTCCAAGTTGCAACTCTCCACACCCGGCCGCTACCC  
GTGGGGGACTCGATCGCTTCCGCTAGGCTGAATTGCGCGATGCGCTGGT~CCTGG~TTGG  
GGGTGGCCAGGCAGCGCGTG~AGAACTGCTGGGGTGCGTGG~CCCCGGTGTGCGCGCACC  
CAGAGTCTGGGTGCAGCTTCGCTCCGCCAGGTTCTCC~TCCCCTCACTCTCTCCCATCT  
CCTCCCTCCTCTAAACACCCCG~CCCCTGGGGCTGCGGGGCTCCCTCTATTTACCGGCCA  
G~TGAGTACACAAAGCGGCGGGTG~AGGGG~AAGCTTCGCAGGCGTGCACTAAGCAGTGA  
GATCACTGGCGTTATAAATATCCTGGTGCCAGAGCCGAGATCCGCTCGGGTGGCCTCTCT  
CTCCCCCTCTTTCT~CCCGAGG~CTATGT~CCACCCGGTGTGCGAGGGGGGCAGCGCCA  
GAGGCACACCCGCCGCGGGGGCTACAAAGCCCAGGATYAGCCCTGCAA

>KR138-promoter-5' UTR

GGGGAAGATGTTGTCGAGCACCCATTTCCAAGTTGCAACTCTCCACACCCGCCGCTACCC  
GTGGGGGACTCGATCGCTTCCGCTAGGCTGAATTGCGCGATGCGCTGGT~CCTGG~TTGG  
GGGTGGCCAGGCAGCGCGTG~AGAACTGCTGGGGTGCGTGG~CCCCGGTGTGGGCGCACC  
CAGAGTCTGGGTGCAGCTTCGCTCCGCCAGCTTCTCC~TCCCCTCACTCTCTCCCATCT  
CCTCCCTCCTCTAAACACCCCG~CCCCTGGGGCTGCGGGGCTCCCTCTATTTACCGGCCA  
G~TGAGTACACAAAGCGGCGGGTG~AGGGG~AAGCTTCGCAGGCGTGCACTAAGCAGTGA  
GATCACTGGCGTTATAAATATCCTGGTGCCAGAGTTCGAGATCCGCTCGGGTGGCCTCTCT  
CTCCCCCTCTTTCT~CCCGAGG~CTATGT~CCACCCGGTGTGCGAGGGGGGCAGCGCCA  
GAGGCACACCCGCCGCGGGGGCTACAAAGCCCAGGATCAGCCCTGCAA

>KR14-promoter-5' UTR

GGGGAAGATGTTGTCGAGCACCCATTTCCAAGTTGCAACTCTCCACACCCGCCGCTACCC  
GTGGGGGACTCGATCGCTTCCGCTAGGCTGAATTGCGCGATGCGCTGGT~CCTGG~TTGG  
GGGTGGCCAGGCAGCGCGTG~AGAACTGCTGGGGTGCGTGG~CCCCGGTGTGGGCGCACC  
CAGAGTCTGGGTGCAGCTTCGCTCCGCCAGCTTCTCC~TCCCCTCACTCTCTCCCATCT  
CCTCCCTCCTCTAAACACCCCG~CCCCTGGGGCTGCGGGGCTCCCTCTATTTACCGGCCA  
G~TGAGTACACAAAGCGGCGGGTG~AGGGG~AAGCTTCGCAGGCGTGCACTAAGCAGTGA  
GATCACTGGCGTTATAAATATCCTGGTGCCAGAGTTCGAGATCCGCTCGGGTGGCCTCTCT  
CTCCCCCTCTTTCT~CCCGAGG~CTATGT~CCACCCGGTGTGCGAGGGGGGCAGCGCCA  
GAGGCACACCCGCCGCGGGGGCTACAAAGCCCAGGATCAGCCCTGCAA

>L03508-promoter-5' UTR

GGGGGAGATGTTGTCGAGCACCCATTTCTAAGTTGCAACTCTCCACACCCGCCGCTACCC  
GTGGGGGACTCGATCGCTTCCGCTAGGCTGAATTGCGCGATGCGCTGGT~CCTGG~TTGG  
GGGTGGCCAGGCAGCGCGTG~AGAACTGCTGGGGTGCGTGG~CCCCGGTGTGGGCGCACC  
CAGAGTCTGGGTGCAGCTTCGCTCCGCCAGCTTCTCC~TCCCCTCACTCTCTCCCATCT  
CCTCCCTCCTCTAAACACCCCG~CCCCTGGGGCTGCGGGGCTCCCTCTATTTACCGGCCA  
G~TGAGTACACAAAGCGGCGGGTG~AGGGG~AAGCTTCGCAGGCGTGCACTAAGCAGTGA  
GATCACTGGCGTTATAAATATCCTGGTGCCAGAGCCGAGATCCGCTGGGGTGGCCTCTCT

CTCCCCCTCTTTCT~CCCGAGG~CTATGT~CCACCCGGTGCTGCGAGGGGGGCAGCGCCA  
GAGGCACACCGCCGCGGGGGCTACAAAGCCCAGGATCAGCCCTGCAA

>L03505-promoter-5' UTR

GGGGGAGATGTTGTCGAGCACCCATTTCTAAGTTGCAACTCTCCACACCCGCCCTCTACCC  
GTGGGGGACTCGATCGCTTCCGCTAGGCTGAATTGCGCGATGCGCTGGTCCTGGTTGGGG  
GTGGCCAGGCAGCGCGTGAGAACTGCTGGGGTGCGTGGCCCCGGTGTGGGCGCACCCAGA  
GTCTGGGTGCAGCTTTCGCTCCGCCAGCTTCTCCTCCCACTCACTCTCTCCCATCTCCTCC  
CTCCTCTAAACACCCCGCCCCTGGGGCTGCGGGGCTCCCTCTATTTACCGGCCAGTGAGT  
ACACAAAGCGGCGGGTG A/Δ

GGGGAAGCTTCGAGGCGTGCACTAAGCAGTGAGATCACTGGCGTTATAAATATCCTGGT  
GCCAGAGCCGAGATCCGCTGGGGTGGCCTCTCTCTCCCCCTCTTTCTCCCGAGGCTATGT  
CCACCCGGTGCTGCGAGGGGGGCAGCGCCAGAGGCACACCGCCGCGGGGGCTACAAAG  
CCCAGGATCAGCCCTGCAA

>Ind.A.1

~~~~~CAAGTTGCAACTCTCCACACCCGCCGCTACCC  
GTGGGGGACTCGATCGCTTCCGCTAGGCTGAATTGCGCGATGCGCTGGT~CCTGG~TTGG  
GGG~~~~~

>Ind.A.2

~~~~~CAAGTTGCAACTCTCCACACCCGCCGCTACCC  
GTGGGGGACTCGATCGCTTCCGCTAGGCTGAATTGCGCGATGCGCTGGT~CCTGG~TTGG  
GGG~~~~~

>Ind.A.3

~~~~~CAAGTTGCAACTCTCCACACCCGCCGCTACCC  
GTGGGGGACTCGATCGCTTCCGCTAGGCTGAATTGCGCGATGCGCTGGT~CCTGG~TTGG  
GGG~~~~~

>Ind.A.4

~~~~~CAAGTTGCAACTCTCCACACCCGCCGCTACCC  
GTGGGGGACTCGATCGCTTCCGNTAGGCTGAATTGCGCGATGCGCTGGTTCCTGG~TTGG  
GGG~~~~~

>Ind.A.5

~~~~~CAAGTTGCAACTCTCCACACCCGCCGCTACCC  
GTGGGGGACTCGATCGCTTCCGCTAGGCTGAATTGCGCGATGCGCTGGT~CCTGG~TTGG  
GGG~~~~~

>Ind.B.1

~~~~~CAAGTTGCAACTCTCCACACCCGCCGCTACCC  
GTGGGGGACTCGATCGCTTCCGCTAGGCTGAATTGCGCGATGCGCTGGT~CCTGG~TTGG  
GGG~~~~~

>Ind.B.2

~~~~~CAAGTTGCAACTCTCCACACCCGCCGCTACCC  
GTGGGGGACTCGATCGCTTCCGCTAGGCTGAATTGCGCGATGCGCTGGT~CCTGG~TTGG  
GGG~~~~~

>Ind.B.3

~~~~~CAAGTTGCAACTCTCCACACCCGCCGCTACCC  
GTGGGGGACTCGATCGCTTCCGCTAGGCTGAATTGCGCGATGCGCTGGT~CCTGG~TTGG  
GGG~~~~~

>Ind.B.4

~~~~~CAAGTTGCAACTCTCCACACCCGCCGCTACCC  
GTGGGGGACTCGATCGCTTCCGCTAGGCTGAATTGCGCGATGCGCTGGT~CCTGG~TTGG



GGG~

>Ind.B.5

~CAAGTTGCAACTCTCCACACCCGCCGCTACCC  
GTGGGGGACTCGATCGCTTCCGNTAGGCTGAATTGCGCGATGCGCTGGT~CCTGG~TTGG  
GGG~

>Ind.A.1

~CTGG~TTGG  
GGGTGGCCAGGCAGCGCGTG~AGAACTGCTGGGGTGCGTGG~CCCCGGTGTGGGCGCACC  
CAGAGTCTGGGTGCAGCTTCGCTCCGCCAGCT~

>Ind.A.2

~CTGG~TTGG  
GGGTGGCCAGGCAGCGCGTG~AGAACTGCTNNGGTGCGTGG~CCCCGGTGTGGGCGCACC  
CAGAGTCTGGGTGCAGCTTCGCTCCGCCAGCT~

>Ind.B.1

~CTAG~TTGG  
GGGTAGCCAGGCAGCGCGTG~AGAACTGCTGGGGTGCGTGG~CCCCGGTGTGGGCACACC  
CAGAGTCTGGGTGCAGCTTCGCTCCGCCAGCT~

>Ind.B.2

~CTAG~TTGG  
GGGTAGCCAGGCAGCACGTG~AGAACTGCTGGGGTGCGTGG~CCCCGGTGTGGGCACACC  
CAGAGTCTGGGTGCAGCTTCGCTCCGCCAGCT~

>Ind.B.3

~CTGG~TTGG  
GGGTGGCCAGGCAGCGCGTG~AGAACTGCTGGGGTGCGTGG~CCCCGGTGTGGGCGCACC  
CAGAGTCTGGGTGCAGCTTCGCTCCGCCAGCT~

>Ind.B.4

~CTGG~TTGG  
GGGTGGCCAGGCAGCGCGTG~AGAACTGCTGGGGTGCGTGG~CCCCGGTGTGGGCGCACC  
CAGAGTCTGGGTGCAGCTTCGCTCCGCCAGCT~

>Ind.B.5

~CTGG~TTGG  
GGGTGGCCAGGCAGCGCGTG~AGAACTGCTGAGGTGCGTGG~CCCCGGTGTGGGCGCACC  
CAGAGTCTGGGTGCAGCTTCGCTCCGCCAGCT~

>Ind.B.6

~CTGGCTTGG  
GGGTGGCCAGGCAGCGCNTGCAGAACTGCTGGGGTGCGTGGAGCCCGGTGTGGGCGCACC  
CAGAGTCTGGGTGCAGCTTCGCTCCGCCAGCT~

>Ind.A.1

~

~~~~~  
~~~~~GCTTCTCC~TCCCACCTCACTCTTTCCCATCT  
CCTCCCTTCTCTAAACANGAAG~NCCCTGGGGCTGCGGGGCTCCCTCTATTTACCGGC~~  
~~~~~

>Ind.A.2

~~~~~  
~~~~~  
~~~~~GCTTCTCC~TCCCACCTCACTCTCTCCCATCT  
CCTCCCTTCTCTAAACACCCCG~CCCCTGGGGCTGCGGGGCTCCCTCTATTTACCGGC~~  
~~~~~

>Ind.A.3

~~~~~  
~~~~~  
~~~~~GCTTCTCC~TCCCACCTCACTCTCTCCCATCT  
CCTCCCTTCTTTAAACACCCCGACCCCTGGGGCTGCGGGGCTCCCTCTATTTACCGGC~~  
~~~~~

>Ind.A.4

~~~~~  
~~~~~  
~~~~~GCTTCTCC~TCCCACCTCACTCTCTCCCATCT  
CCTCCCTTCTCTAAACACCCCG~CCCCTGGGGCTGCGGGGCTCCCTCTATTTACCGGC~~  
~~~~~

>Ind.A.5

~~~~~  
~~~~~  
~~~~~GCTTCTCC~TCCCACCTCACTCTCTCCCATCT  
CCTCCCTTCTCTAAACACCCCG~CCCCTGGGGCTGCGGGGCTCCCTCTATTTACCGGC~~  
~~~~~

>Ind.B.1

~~~~~  
~~~~~  
~~~~~GCTTCTCC~TCCCACCTCACTCTCTCCCATCT  
CCTCCCTTCTCTAAACACCCNG~CCCCTGGGGCTGCGGGGCTCCCTCTATTTACCGGC~~  
~~~~~

>Ind.B.2

~~~~~  
~~~~~  
~~~~~GCTTCTCC~TCCCACCTCACTCTCTCCCATCT  
CCTCCCTTCTCTAAACACNNNN~CCCCTGGGGCTGCGGGGCTCCCTNTATTTACCGGC~~  
~~~~~

>Ind.B.3

~~~~~

~~~~~  
~~~~~  
~~~~~  
~~~~~GCTTCTCC~TCCCCTCACTCTCTCCCATTT  
CCTCCCTTCTCTAAACACCCCGACCCCTGGGGCTGCGGGGCTCCCTCTATTTACCGGC~~  
~~~~~

>Ind.B.4

~~~~~  
~~~~~  
~~~~~  
~~~~~GCTTCTCC~TCCCCTCACTCTCTCCCATCT  
CCTCCCTTCCCTAAACACCGGNACCCCTGGGGCTGCGGGGCTCCCTCTATTTACCGGC~~  
~~~~~

>Ind.B.5

~~~~~  
~~~~~  
~~~~~  
~~~~~GCTTCTCCCACCCACTCACTCTCTCCCATCT  
CCTCCCTTCTCTAAACACCCCGACCCCTGGGGCTGCGGGGCTCCCTCTATTTACCGGC~~  
~~~~~

>Ind.A.1

~~~~~  
~~~~~  
~~~~~  
~~~~~GCCA  
G~TGAGTACACAAAGCGGCGGGTG~AGGGG~AAGCTTCGCAGGCGTGCACTAAGCAGTGA  
GATCACTGGCGTTATA~~~

>Ind.A.2

~~~~~  
~~~~~  
~~~~~  
~~~~~GCCA  
G~TGAGTACACAAAGCGGCGGGTG~AGGGG~AAGCTTCGCAGGCGTGCACTAAGCAGTGA  
GATCACTGGCGTTATA~~~

>Ind.A.3

~~~~~  
~~~~~  
~~~~~  
~~~~~GCCA  
A~TGAGTACACAAAGCGGCGGGTG~AGGGG~AAGCTTCGCAGGCGTGCACTAAGCAGTGA  
GATCACTGGCGTTATA~~~

>Ind.A.4

~~~~~  
~~~~~  
~~~~~  
~~~~~

~~~~~GCCA  
G~TGAGTACACAAAGCGGCGGGTGNAGGGG~AAGCTTCGTAGGCGTGCACTAAGCAGTGA  
GATCATTGGCGTTATA~~~

>Ind.A.5

~~~~~  
~~~~~  
~~~~~

~~~~~GCCA  
G~TGAGTACACAAAGCGGCGGGTG~AGGGG~AAGCTTCGCAGGCGGCACTAAGCAGTGA  
GATCATTGGCGTTATA~~~

>Ind.B.1

~~~~~  
~~~~~  
~~~~~

~~~~~GCCA  
G~TGAGTACACAAAGCGGCGGGTG~AGGGG~AAGCTTCGCAGGCGTGCACTAAGCAGTGA  
GATCACTGGCGTTATA~~~

>Ind.B.2

~~~~~  
~~~~~  
~~~~~

~~~~~GCCA  
GNTGAGTACACAAAGCGGCGGGTGNAGGGGNAAGCTTCGCAGGCGTGCACTAAGCAGTGA  
GATCACTGGCGTTATA~~~

>Ind.B.3

~~~~~  
~~~~~  
~~~~~

~~~~~GCCA  
G~TGAGTACATAAAGCGGCGGGTG~AGGGG~AAGCTTCNCAGGCGTGCACTAAGCAGTGA  
GATCACTGGCGTTATA~~~

>Ind.B.4

~~~~~  
~~~~~  
~~~~~

~~~~~GCCA  
G~TGAGTACACAAAGCGGCGGGTG~AGGGG~AAGCTTCGCAGGCGTGCACTAAGCAGTGA  
GATCACTGGCGTTATA~~~

>Ind.B.5

~~~~~  
~~~~~  
~~~~~

~~~~~GCCA  
G~TGAGTACACAAAGCGGCGGGTG~AGGGG~AAGCTTCNCAGGCGTGCACTAAGCAGTGA  
GATCACTGGCGTTATA~~~

>Ind.A.1

~~~~~TTATAAATATCCTGGTGCCAGAGCCGAGATCCGCTCGGGTGGCCTCTCT  
CTCCCCCTCTTNTACCCGAGGNCCATGT~CCACCCGGTGCTGCGAGGGGGG

>Ind.A.2

~~~~~TTATAAATATCCTGGTGCCAGAGCCGAGATCCGCTCGGGTGGCCTCTCT  
CTCCCCCTCTTTCT~CCCGAGG~CTATGT~CCACCCGGTGCTGCGAGGGGGG

>Ind.A.3

~~~~~TTATAAATATCCTGGTGCTAGAGCCGAGATCCGCTCNGGTGGCCTCTCT  
CTCCCCCTCTTTCT~CCCGAGG~CTATGT~CCACCCGGTGCTGCGAGGGGGG

>Ind.A.4

~~~~~TTATAAATATCCTGGTGCCAGAGCCGAGATCCGCTCGGGTGGCCTCTCT  
CTCCCCCTCTTTCTNCCCGAGG~CTATGT~CTACCCGGTGCTGCGAGGGGGG

>Ind.B.1

~~~~~TTATAAATATCCTGGTGCCAGAGCCGAGATCCGCTCGGGTGGCCTCTCT  
CTCCCCCTCTTTCT~CCCGAGG~CTATGT~CCACCCGGTGCTGCGAGGGGGG
