# Supplementary material for: Genetic variation at hair length candidate genes in elephants and the extinct woolly mammoth
Source: Springer Nature journal article supplement (doi:10.1186/1471-2148-9-232), 2009-01-01

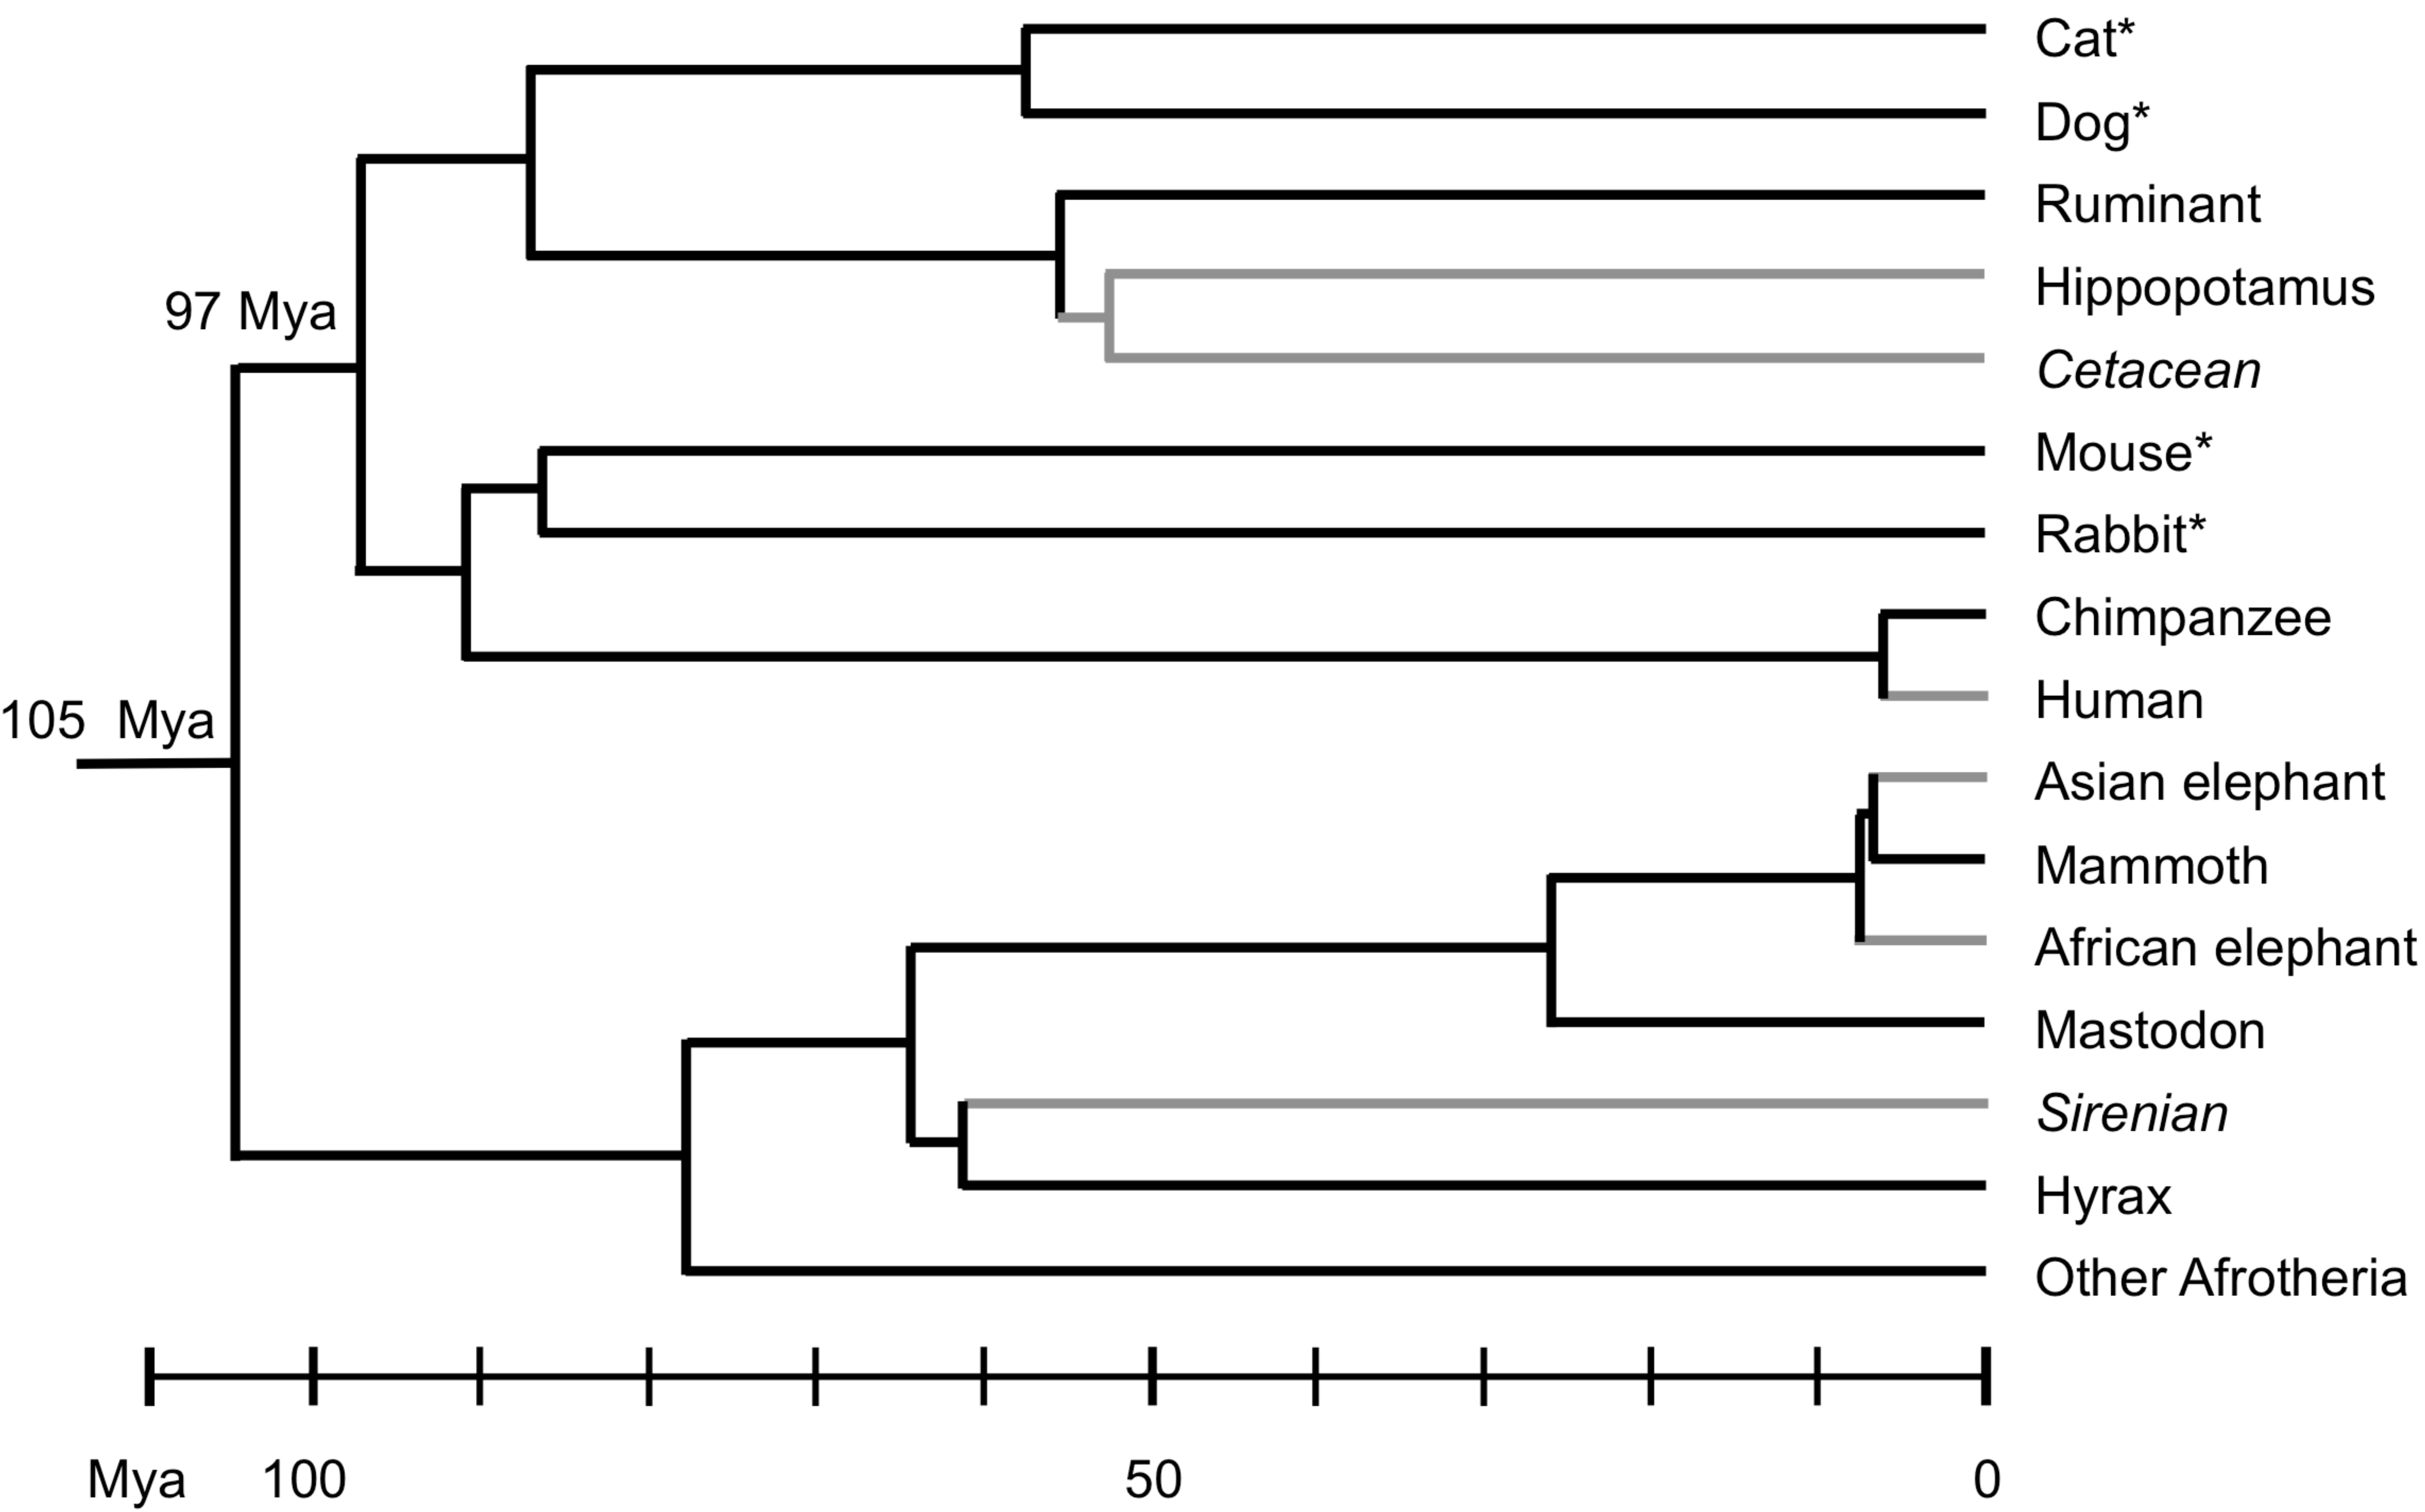

Supplement: 12862_2009_1146_MOESM2_ESM.pdf [file 12862_2009_1146_MOESM2_ESM.pdf]
