# Supplementary material for: Genetic variation at hair length candidate genes in elephants and the extinct woolly mammoth
Source: Springer Nature journal article supplement (doi:10.1186/1471-2148-9-232), 2009-01-01
Supplement: 12862_2009_1146_MOESM3_ESM.pdf [file 12862_2009_1146_MOESM3_ESM.pdf]

|                  |   |                           | 5          | 15         | 25         | 35         | 45         | 55         | 65         | 75         | 85         | 95         |
|------------------|---|---------------------------|------------|------------|------------|------------|------------|------------|------------|------------|------------|------------|
| Asian elephant   | { | <i>E. maximus</i> Ema-10  | MSLSFLLLLF | LSHLILSAWA | HGEKRLAPKG | QPGPAATDRS | PGGDSTSQSC | SSTTSSSSPS | STSSAPAATL | GNQGSQSEQS | SFQWSPSGRR | TGSLYCRVGI |
|                  |   | <i>E. maximus</i> Ema-6   | .....      | .....      | .....      | .....      | .....      | .....      | .....      | .....      | .....      | .....      |
| Forest elephant  | { | <i>L. cyclotis</i> LO3508 | .....      | .....      | .....      | A          | .....      | .....      | .....      | .....      | .....      | .....      |
|                  |   | <i>L. cyclotis</i> LO3505 | .....      | .....      | .....      | A          | .....      | .....      | .....      | .....      | .....      | .....      |
| Savanna elephant | { | <i>L. africana</i> KR0014 | .....      | .....      | .....      | .....      | .....      | .....      | .....      | .....      | .....      | .....      |
|                  |   | <i>L. africana</i> KR0138 | .....      | .....      | .....      | .....      | .....      | .....      | .....      | .....      | .....      | .....      |
| Mammoth          |   | <i>M. primigenius</i> Ind | .....      |            |            |            |            |            |            |            |            |            |
| Bovine           |   | <i>B. taurus</i>          | .....      | .....      | Q          | .....      | E.N        | ..A.SRR.S  | ..AT...-   | PA..SS..SR | .GP..SL..  | .....      |
| Human            |   | <i>H. sapiens</i>         | .....      | F          | .....      | .....      | N          | R.S.SR..S  | ..AM....-  | -A..S...S  | .S...L..   | .....      |
| Cat              |   | <i>F. catus</i>           | .....      | .....      | H          | .....      | G.N        | A.A.S.R.S  | RG.....-   | V..S.S.S   | .....L..   | .....      |
| Dog              |   | <i>C. familiaris</i>      | ...L.....  | .....      | H          | .....      | G.N        | ..AGG.STS  | GG.....-   | V...G.SP   | .IR.....G  | .....F     |
| Mouse            |   | <i>M. musculus</i>        | ...L.F.I.C | ...H....   | .....      | T.E        | ..A.P--N   | ..DS.G.RGR | ..A.F...-  | A..PV..SP  | .S.....H   | .....      |

|                  |   |                           | 105        | 115        | 125        | 135        | 145        | 155        | 165        | 175        | 185        | 195        |
|------------------|---|---------------------------|------------|------------|------------|------------|------------|------------|------------|------------|------------|------------|
| Asian elephant   | { | <i>E. maximus</i> Ema-10  | GFHLQIYPDG | KVNGSHEASM | LSILEIFAVS | QGIVGIRGVF | SNKFLAMSKK | GKLHASAKFT | DDCKFRERFQ | ENSYNTYASA | IHRTEKTGRE | WYVALNKRKG |
|                  |   | <i>E. maximus</i> Ema-6   | .....      | .....      | #####      | #####      | #####      | #####      | .....      | .....      | .....      | .....      |
| Forest elephant  | { | <i>L. cyclotis</i> LO3508 | .....      | .....      | #####      | #####      | #####      | #####      | .....      | .....      | .....      | .....      |
|                  |   | <i>L. cyclotis</i> LO3505 | .....      | .....      | #####      | #####      | #####      | #####      | .....      | .....      | .....      | .....      |
| Savanna elephant | { | <i>L. africana</i> KR0014 | .....      | .....      | #####      | #####      | #####      | #####      | .....      | .....      | .....      | .....      |
|                  |   | <i>L. africana</i> KR0138 | .....      | .....      | #####      | #####      | #####      | #####      | .....      | .....      | .....      | .....      |
| Mammoth          |   | <i>M. primigenius</i> Ind | .....      |            |            |            |            |            |            |            |            |            |
| Bovine           |   | <i>B. taurus</i>          | .....      | N          | .....      | .....      | .....      | .....      | .....      | .....      | .....      | .....      |
| Human            |   | <i>H. sapiens</i>         | .....      | N          | V          | .....      | .....      | .....      | .....      | .....      | .....      | .....      |
| Cat              |   | <i>F. catus</i>           | .....      | N          | .....      | .....      | .....      | .....      | .....      | .....      | PA         | .....      |
| Dog              |   | <i>C. familiaris</i>      | .....      | N          | .....      | .....      | .....      | .....      | .....      | .....      | S.PA       | .....      |
| Mouse            |   | <i>M. musculus</i>        | .....      | V          | .....      | .....      | .....      | .....      | .....      | .....      | .....      | .....      |

|                  |   |                           | 205        | 215        | 225        | 235        | 245        | 255        | 265          |
|------------------|---|---------------------------|------------|------------|------------|------------|------------|------------|--------------|
| Asian elephant   | { | <i>E. maximus</i> Ema-10  | AKRGCSPRVK | PQHISTHFLP | RFKQSEQPEL | SFTVTVPEKK | KPPNPIKPKV | PLSAPRKSPN | TVKYRLKFRF G |
|                  |   | <i>E. maximus</i> Ema-6   | .....      | .....      | .....      | .....      | .....      | .....      | .....        |
| Forest elephant  | { | <i>L. cyclotis</i> LO3508 | .....      | .....      | .....      | .....      | .....      | .....      | .....        |
|                  |   | <i>L. cyclotis</i> LO3505 | .....      | .....      | .....      | .....      | .....      | .....      | .....        |
| Savanna elephant | { | <i>L. africana</i> KR0014 | .....      | .....      | .....      | .....      | .....      | .....      | .....        |
|                  |   | <i>L. africana</i> KR0138 | .....      | .....      | .....      | .....      | .....      | .....      | .....        |
| Mammoth          |   | <i>M. primigenius</i> Ind | .....      |            |            |            |            |            |              |
| Bovine           |   | <i>B. taurus</i>          | .....      | V          | .....      | L          | .....      | V          | .....        |
| Human            |   | <i>H. sapiens</i>         | .....      | .....      | .....      | .....      | S          | .....      | I            |
| Cat              |   | <i>F. catus</i>           | .....      | .....      | .....      | L          | .....      | S.V        | .....        |
| Dog              |   | <i>C. familiaris</i>      | .....      | V          | .....      | L.H        | .....      | SHV        | .....        |
| Mouse            |   | <i>M. musculus</i>        | .....      | V          | .....      | .....      | .....      | --V        | .....        |
