# Supplementary material for: Genetic variation at hair length candidate genes in elephants and the extinct woolly mammoth
Source: Springer Nature journal article supplement (doi:10.1186/1471-2148-9-232), 2009-01-01

A

|              |     |                                                                |     |
|--------------|-----|----------------------------------------------------------------|-----|
| human_FGF5   | 1   | <b>MSLSFLLLLFFSHLILSAWAHGEKRLAPKGQPG</b> PAATDRNPRGSSSRQSS     | 50  |
| mammoth_FGF5 | 1   | <b>MSLSFLLLLFSLHILSAWAHGEKRLAPKGQPG</b> PAATDRSPGGDSTSQSC      | 50  |
| human_FGF5   | 51  | SSAMSS---SSASSSPAASLGSQSGLEQSSFQWSPSGRRTGSLYCRVGI              | 97  |
| mammoth_FGF5 | 51  | SSTTSSSSPSSTSSAPAATLGNQSGSSEQSSFQWSPSGRRTGSLYCRVGI             | 100 |
| human_FGF5   | 98  | GFHLQIYPDGKVNGSHEANMLSVLEIFAVSQGIVGIRGVFVSNKFLAMSKK            | 147 |
| mammoth_FGF5 | 101 | GFHLQIYPDGKVNGSHEASMLSI LEIFAVSQGIVGIRGVFVSNKFLAMSKK           | 150 |
| human_FGF5   | 148 | GKLHASAKFTDDCKFRERERFQENSYNTYASA <b>IHRTEKTGREWY</b> VALNKR GK | 197 |
| mammoth_FGF5 | 151 | GKLHASAKFTDDCKFRERERFQENSYNTYASA <b>IHRTEKTGREWY</b> VALNKR GK | 200 |
| human_FGF5   | 198 | <b>AKRGCS</b> PRVKPQHISTHFLPREFKQSEQPELSFTVTVPEKKKPPSPIKPKI    | 247 |
| mammoth_FGF5 | 201 | <b>AKRGCS</b> PRVKPQHISTHFLPREFKQSEQPELSFTVTVPEKKKPPNPPIKPKV   | 250 |
| human_FGF5   | 248 | PLSAPRKNTNSVKYRLKFRFG                                          | 268 |
| mammoth_FGF5 | 251 | PLSAPRKSPNTVKYRLKFRFG                                          | 271 |

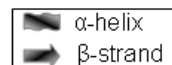

B

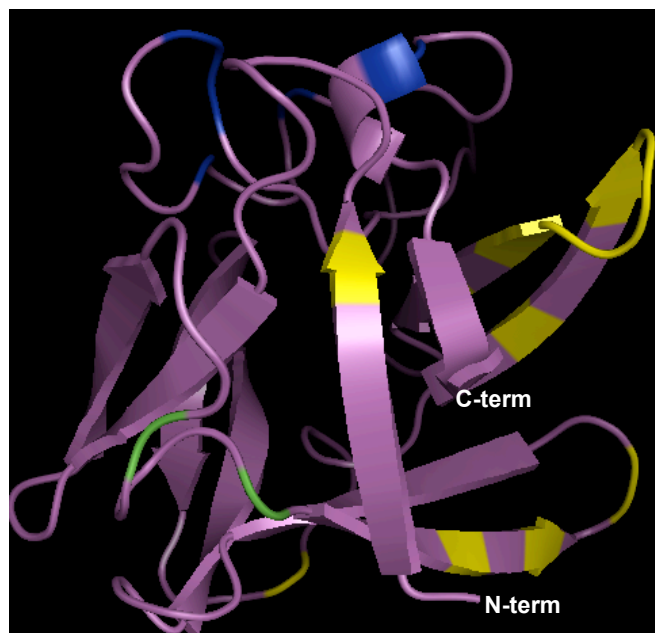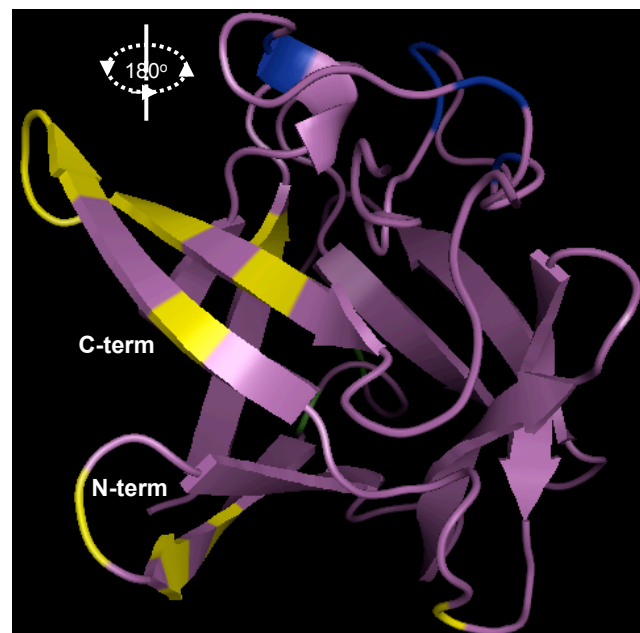

Supplement: 12862_2009_1146_MOESM4_ESM.pdf [file 12862_2009_1146_MOESM4_ESM.pdf]
