# Supplementary material for: Genetic variation at hair length candidate genes in elephants and the extinct woolly mammoth
Source: Springer Nature journal article supplement (doi:10.1186/1471-2148-9-232), 2009-01-01
Supplement: 12862_2009_1146_MOESM5_ESM.pdf [file 12862_2009_1146_MOESM5_ESM.pdf]

|                  |                                                                                  |     |
|------------------|----------------------------------------------------------------------------------|-----|
| Savanna elephant | ATGACTTCTCTAACTGTTGCAGCTCCCTCCTCAGTGGGTGAGTTTCAGAGGCCAGGGATGCCTCCTCATGCCTCC - AG | 78  |
|                  | M T S L T V A A P S S V G E F Q R P G M P P H A S S                              |     |
| Woolly mammoth   | .....G.....                                                                      |     |
|                  | M T S L T V A A P S S V G E F Q R P G M P P H A S S                              |     |
| Human            | .....-G..CA.....T.....C...CAG.....AC.C.....TCTG.....TTG..                        |     |
|                  | M T S D H C S S L L S G Q V S E A N A A S L C L L A                              |     |
| Savanna elephant | CCACCCTGACTCATGCCAACTGAGCCTGTGTGGGGGCAACCTCTCTGGGCCAACCCAGCCTCTGTCTGCCCCATAGCT   | 156 |
|                  | H P D S C Q L S L C G G N L S G P T Q P L S A P <b>Stop</b>                      |     |
| Woolly mammoth   | .....G.....G.....T.....T.....                                                    |     |
|                  | H P D S C Q L S L C G G N L S G P T Q P L S A P <b>Stop</b>                      |     |
| Human            | .T.ATG..G.A.....TC...T.C.....T.G..TC.C.....GC.T.....CA.C..                       |     |
|                  | N V A H A N R V R V G S T P L G R L S L C L P P T C                              |     |
| Savanna elephant | GTCACACCGCTTGCCCCTTGCCGGGGACGTGCCACATTCCAGGCAACACTGGAAGTTGTGGGACATATGGTGAAGGA -  | 234 |
| Woolly mammoth   | .....A.....                                                                      |     |
| Human            | .C.....A...T.....A.....C.....T.....TC...TC.....G.C..CC.C...AACA                  |     |
|                  | C H T T C P L P G T C H I P G N I G I C G A Y R E N                              |     |
| Savanna elephant | - - CCGAATGGCCATGAGAAGGAGACCATGCA - TTTCTGAACAACCACT                             | 283 |
| Woolly mammoth   | - - .....G.....C                                                                 |     |
| Human            | CC.T...C.....C.....-G.....A...G...G.C                                            |     |
|                  | T L N G H E K E T M Q F L N D R                                                  |     |
